# Supplementary material for: Multi-Omics Profiling in Marfan Syndrome: Further Insights into the Molecular Mechanisms Involved in Aortic Disease
Source: Int J Mol Sci. 2021 Dec 31;23(1):438. doi: 10.3390/ijms23010438 (PMC8745050; doi:10.3390/ijms23010438)
Supplement: Supplementary file 1 [file ijms-23-00438-s001.zip › supplementary-tables-MFS-multiomics_v27-12-2021.xlsx]

## Sheet: S1. Top expressed genes
Table S1. Highly expressed genes in aortic samples from controls
Gene identifier	Symbol	Protein	Mean RPKM
ENSG00000198804	MT-CO1	cytochrome c oxidase subunit 1	7769.44
ENSG00000198938	MT-CO3	cytochrome c oxidase subunit 3	6176.74
ENSG00000198886	MT-ND4	NADH-ubiquinone oxidoreductase chain 4	5891.15
ENSG00000198712	MT-CO2	cytochrome c oxidase subunit 2	5188.44
ENSG00000198899	MT-ATP6	ATP synthase subunit a	4779.45
ENSG00000198727	MT-CYB	cytochrome b	4774.44
ENSG00000198763	MT-ND2	NADH-ubiquinone oxidoreductase chain 2	4293.84
ENSG00000228253	MT-ATP8	ATP synthase protein 8	3697.81
ENSG00000198888	MT-ND1	NADH-ubiquinone oxidoreductase chain 1	3612.17
ENSG00000198786	MT-ND5	NADH-ubiquinone oxidoreductase chain 5	3083.59
ENSG00000210082	MT-RNR2	humanin	3039.49
ENSG00000198840	MT-ND3	NADH-ubiquinone oxidoreductase chain 3	2916.9
ENSG00000087086	FTL	ferritin light chain	2596.95
ENSG00000212907	MT-ND4L	NADH-ubiquinone oxidoreductase chain 4L	2589.51
ENSG00000101335	MYL9	myosin regulatory light polypeptide 9	2475.21
ENSG00000111341	MGP	matrix Gla protein	1690.65
ENSG00000075624	ACTB	actin, cytoplasmic 1	1669.33
ENSG00000107796	ACTA2	actin, aortic smooth muscle	1650.29
ENSG00000251705	RNA5-8SP6		1617.79
ENSG00000149591	TAGLN	transgelin	1609.27
ENSG00000152583	SPARCL1	SPARC-like protein 1	1530.09
ENSG00000163453	IGFBP7	insulin-like growth factor-binding protein 7	1519.79
ENSG00000182492	BGN	biglycan	1493.74
ENSG00000156508	EEF1A1	elongation factor 1-alpha 1	1452.85
ENSG00000197956	S100A6	protein S100-A6	1121.37
ENSG00000205542	TMSB4X	thymosin beta-4	1022.95
RPKM reads per kilobase per million

## Sheet: S2. DEG MFS vs controls
Table S2. Differentially expressed genes between MFS and controls
A positive log2 FC value means that the respective gene is overexpressed in MFS
Gene identifier	Symbol	Normalized counts	log2 FC	p-value	FDR
ENSG00000000938	FGR	573.846	-1.35614	0.000997741	0.018092
ENSG00000001630	CYP51A1	29.4441	-0.855326	0.00294769	0.0362386
ENSG00000004948	CALCR	6.30901	1.34772	0.000684831	0.0138938
ENSG00000005812	FBXL3	1706.27	0.753394	1.37143e-05	0.000727207
ENSG00000006015	C19orf60	288.863	-0.872692	6.09436e-05	0.00238901
ENSG00000006283	CACNA1G	34.8322	-1.17495	0.00434009	0.0466393
ENSG00000006704	GTF2IRD1	174.659	-0.765389	0.00112228	0.0194919
ENSG00000007384	RHBDF1	1183.35	-0.629773	0.00187153	0.0272149
ENSG00000007908	SELE	629.45	-1.2614	0.00311728	0.0377707
ENSG00000009780	FAM76A	337.21	0.622151	2.28621e-05	0.00107395
ENSG00000009950	MLXIPL	71.9288	-1.30487	0.00235343	0.0313936
ENSG00000011198	ABHD5	278.989	-0.595796	0.00312466	0.0377947
ENSG00000011422	PLAUR	449.842	-1.19794	0.000185872	0.00555184
ENSG00000012171	SEMA3B	1032.08	-0.622022	0.00382845	0.0428288
ENSG00000013364	MVP	2993.55	-0.722968	1.29763e-06	9.98079e-05
ENSG00000013588	GPRC5A	1561.7	-1.12231	1.19281e-05	0.000647202
ENSG00000014164	ZC3H3	259.256	-0.633675	0.0017539	0.0259985
ENSG00000017373	SRCIN1	14.1424	-1.14281	0.00184235	0.0269587
ENSG00000017483	SLC38A5	112.214	-0.861774	0.00466099	0.0487894
ENSG00000017621	MAGIX	70.2678	-0.746814	0.00100375	0.0181507
ENSG00000018280	SLC11A1	378.637	-1.23575	0.00474213	0.0493411
ENSG00000019169	MARCO	321.45	-1.65037	3.62584e-05	0.00155696
ENSG00000023902	PLEKHO1	1968.22	-0.758955	2.35996e-06	0.000161415
ENSG00000025708	TYMP	532.355	-1.07012	0.00319159	0.0382081
ENSG00000028137	TNFRSF1B	1037.09	-0.90666	0.00127736	0.0210258
ENSG00000028839	TBPL1	257.694	0.631949	0.00141955	0.0224979
ENSG00000030419	IKZF2	144.793	1.13268	0.000127544	0.00419023
ENSG00000033327	GAB2	2370.13	-0.739733	0.000499975	0.0110978
ENSG00000034533	ASTE1	166.347	0.590645	0.000488523	0.0109182
ENSG00000036672	USP2	48.1759	-1.22815	0.00333467	0.0393083
ENSG00000037241	RPL26L1	146.214	-1.51538	1.54033e-19	5.77568e-17
ENSG00000042317	SPATA7	110.792	0.676711	0.00149213	0.0232432
ENSG00000043093	DCUN1D1	547.674	0.721216	0.00152948	0.0236669
ENSG00000047597	XK	81.5869	1.00445	1.80998e-06	0.000132476
ENSG00000048052	HDAC9	1236.24	0.956073	7.39362e-05	0.00277532
ENSG00000049246	PER3	1466	0.7449	0.00186112	0.0271331
ENSG00000049759	NEDD4L	151.684	-0.805568	3.06271e-05	0.00136252
ENSG00000049769	PPP1R3F	136.395	-0.661819	0.00166822	0.0252009
ENSG00000051128	HOMER3	187.684	-0.635626	0.000124722	0.00413077
ENSG00000051523	CYBA	842.181	-1.00767	6.62861e-05	0.00255859
ENSG00000054219	LY75	164.703	1.02467	0.00138059	0.0221126
ENSG00000058404	CAMK2B	139.704	-1.43583	0.000386585	0.00940615
ENSG00000058866	DGKG	158.539	-0.860175	0.00266731	0.0341513
ENSG00000059728	MXD1	671.189	-1.20039	1.35552e-05	0.000720588
ENSG00000059804	SLC2A3	1397.8	-1.14909	0.00303579	0.0370614
ENSG00000060491	OGFR	653.541	-0.657706	0.000161829	0.00501191
ENSG00000060558	GNA15	137.158	-0.951745	0.00234225	0.0313587
ENSG00000060656	PTPRU	799.797	-0.622901	0.000941328	0.017431
ENSG00000062282	DGAT2	292.424	-1.43175	0.00101283	0.0182241
ENSG00000062822	POLD1	160.481	-0.652604	0.000558941	0.0119639
ENSG00000063176	SPHK2	243.682	-0.721487	0.000905808	0.0169566
ENSG00000063245	EPN1	1124.16	-0.761636	1.01901e-05	0.000560135
ENSG00000063438	AHRR	30.4691	-1.33343	0.00173262	0.0257842
ENSG00000064309	CDON	585.859	-0.819549	0.00363521	0.0413611
ENSG00000064932	SBNO2	1479.56	-1.39538	2.11838e-05	0.0010098
ENSG00000064933	PMS1	200.667	0.774668	0.000246969	0.00679666
ENSG00000066279	ASPM	41.8215	1.10423	0.00464096	0.0487011
ENSG00000066336	SPI1	540.476	-1.11625	0.00268092	0.034242
ENSG00000066468	FGFR2	197.534	-1.37508	4.30622e-08	4.68508e-06
ENSG00000066557	LRRC40	273.933	0.617632	0.000988773	0.0180105
ENSG00000066654	THUMPD1	1315.69	0.718314	1.38018e-05	0.00073
ENSG00000068885	IFT80	217.385	0.646736	0.00305876	0.0372551
ENSG00000069399	BCL3	559.429	-1.53075	6.267e-06	0.000370026
ENSG00000069535	MAOB	2768.6	0.624641	0.0027454	0.0345859
ENSG00000069702	TGFBR3	1597.28	-0.892497	0.000625485	0.012991
ENSG00000069943	PIGB	229.956	0.64176	0.00449261	0.0476444
ENSG00000070087	PFN2	3864.82	0.993257	2.15403e-05	0.001021
ENSG00000070423	RNF126	335.141	-0.919326	4.37453e-06	0.000270893
ENSG00000072071	LPHN1	420.152	-0.858972	6.3124e-06	0.000371282
ENSG00000072195	SPEG	7530.39	-0.659395	0.00467193	0.0488483
ENSG00000072310	SREBF1	622.73	-1.42793	1.839e-06	0.000134081
ENSG00000073009	IKBKG	207.361	0.913709	1.90752e-06	0.000136704
ENSG00000073921	PICALM	7015.85	0.588612	0.00158738	0.024312
ENSG00000074855	ANO8	217.017	-0.615016	0.00353311	0.0407537
ENSG00000075089	ACTR6	392.401	0.790417	0.000275454	0.0073215
ENSG00000075391	RASAL2	1199.2	0.636727	4.3349e-06	0.000269302
ENSG00000075399	VPS9D1	251.014	-0.733351	0.00245126	0.0322504
ENSG00000075426	FOSL2	6001.62	-0.857789	6.09824e-05	0.00238901
ENSG00000075643	MOCOS	123.137	-0.676633	0.00326701	0.0387574
ENSG00000075651	PLD1	768.349	1.0583	2.31795e-19	8.539e-17
ENSG00000075790	BCAP29	2318.34	0.674513	0.00208754	0.029087
ENSG00000076944	STXBP2	122.981	-1.11191	0.00325405	0.0386911
ENSG00000077044	DGKD	1544.58	-1.14432	0.000142399	0.00454421
ENSG00000077238	IL4R	1441.13	-0.708222	0.00267779	0.0342229
ENSG00000077454	LRCH4	544.703	-0.638438	0.00192109	0.0277054
ENSG00000077809	GTF2I	2161.09	1.6625	2.30622e-60	4.40237e-57
ENSG00000077984	CST7	109.226	-1.43738	0.000447117	0.0103698
ENSG00000078098	FAP	1327.5	1.03445	0.00103019	0.0184644
ENSG00000079385	CEACAM1	48.975	-1.20508	0.00304961	0.037191
ENSG00000081181	ARG2	125.914	-1.3549	1.90361e-06	0.000136704
ENSG00000081277	PKP1	31.6631	1.52151	9.24456e-05	0.00329154
ENSG00000082898	XPO1	2264.73	0.704566	0.00191593	0.027669
ENSG00000083535	PIBF1	355.001	0.697003	0.000587096	0.0123898
ENSG00000085365	SCAMP1	934.605	0.853141	0.00157398	0.0241884
ENSG00000087076	HSD17B14	197.461	-0.858859	0.000165969	0.00510253
ENSG00000087085	ACHE	35.9741	-1.00759	0.00447433	0.0476188
ENSG00000088280	ASAP3	587.748	-0.594612	0.000630774	0.0130621
ENSG00000089157	RPLP0	11971.8	-0.900752	2.26449e-11	3.74408e-09
ENSG00000089159	PXN	2426.93	-0.706919	4.4379e-05	0.00183801
ENSG00000089225	TBX5	12.7443	1.56171	0.000309482	0.00791535
ENSG00000089351	GRAMD1A	897.921	-0.665548	0.000190211	0.00565729
ENSG00000090013	BLVRB	980.715	-0.776754	9.28188e-05	0.00329225
ENSG00000090339	ICAM1	1000.75	-1.26307	0.000149658	0.0047185
ENSG00000090539	CHRD	321.851	-0.880593	0.0024179	0.0319769
ENSG00000090971	NAT14	155.739	-0.709234	0.000981728	0.0179442
ENSG00000091482	SMPX	61.7179	0.902062	0.00380447	0.042606
ENSG00000091879	ANGPT2	516.799	1.11965	7.48929e-07	6.11907e-05
ENSG00000092140	G2E3	212.903	0.882643	0.000233637	0.00655871
ENSG00000092969	TGFB2	921.601	1.17343	0.0017724	0.0261355
ENSG00000094963	FMO2	6471.34	0.997017	0.0027747	0.0347632
ENSG00000096872	IFT74	230.628	0.678379	0.00245697	0.0323053
ENSG00000096968	JAK2	2318.67	0.695115	0.000195485	0.00577061
ENSG00000097007	ABL1	3469.47	-0.598173	0.00250929	0.0328274
ENSG00000099246	RAB18	1617.37	0.658628	0.000430469	0.0100994
ENSG00000099364	FBXL19	258.296	-0.609324	5.72567e-05	0.00228136
ENSG00000099624	ATP5D	596.112	-0.800565	0.000196235	0.00577107
ENSG00000099625	C19orf26	35.0915	-1.369	0.00111219	0.0193486
ENSG00000099797	TECR	501.479	-0.650428	1.58767e-05	0.000803821
ENSG00000099814	CEP170B	1168.13	-0.716827	7.07584e-05	0.00270635
ENSG00000099864	PALM	669.059	-1.15237	0.000665282	0.0136289
ENSG00000099977	DDT	284.636	-0.588849	0.00251508	0.0328546
ENSG00000100033	PRODH	54.5525	-1.39408	0.000458359	0.0105072
ENSG00000100139	MICALL1	499.184	-0.644355	8.58048e-07	6.87683e-05
ENSG00000100242	SUN2	11648.9	-0.608434	0.00358893	0.0410728
ENSG00000100299	ARSA	641.839	-0.594219	0.00418063	0.0456262
ENSG00000100300	TSPO	1571.3	-0.798038	0.000156727	0.00488272
ENSG00000100368	CSF2RB	582.104	-1.29102	0.000656357	0.0134788
ENSG00000100504	PYGL	1245.47	-0.868368	0.000103301	0.0035853
ENSG00000100605	ITPK1	1635.65	-0.587224	0.00334773	0.0393593
ENSG00000100628	ASB2	798.571	-0.816992	0.00082417	0.0157901
ENSG00000100726	TELO2	416.131	-0.614844	0.00244139	0.0321718
ENSG00000100764	PSMC1	1240.54	-1.34039	3.30651e-17	9.91858e-15
ENSG00000100884	CPNE6	14.5998	-1.25755	0.0040048	0.0443293
ENSG00000100889	PCK2	286.702	-0.808962	6.06081e-05	0.00238324
ENSG00000100968	NFATC4	1184.41	-0.675031	2.99108e-05	0.00133916
ENSG00000101000	PROCR	755.37	-0.985158	2.6125e-09	3.40729e-07
ENSG00000101017	CD40	527.164	-0.712874	0.000313925	0.00798865
ENSG00000101084	C20orf24	22.1766	-1.17538	0.000437869	0.0102273
ENSG00000101187	SLCO4A1	144.094	-1.27678	0.00146416	0.0229608
ENSG00000101236	RNF24	2234.08	-0.686842	0.000809508	0.0155946
ENSG00000101276	SLC52A3	23.7588	-1.30863	0.000326305	0.00826508
ENSG00000101278	RPS10L	3.64236	1.2313	0.00392302	0.0436311
ENSG00000101336	HCK	633.202	-1.156	0.00194349	0.0279516
ENSG00000101493	ZNF516	516.516	-0.662806	9.33107e-09	1.10697e-06
ENSG00000101574	METTL4	193.109	0.649869	0.00214124	0.0294637
ENSG00000101928	MOSPD1	168.472	0.650751	0.00144929	0.0227913
ENSG00000101986	ABCD1	362.132	-0.725036	0.00051489	0.0112975
ENSG00000102034	ELF4	465.333	-0.723415	0.000575328	0.0122151
ENSG00000102109	PCSK1N	20.8665	-2.18242	4.80729e-07	4.06779e-05
ENSG00000102359	SRPX2	396.278	-0.968656	7.30559e-05	0.00275904
ENSG00000102452	NALCN	763.55	0.732147	3.3032e-05	0.00144201
ENSG00000102760	RGCC	414.364	0.999163	0.000405768	0.00972639
ENSG00000102802	MEDAG	3801.65	-1.00392	1.87401e-05	0.000908399
ENSG00000102804	TSC22D1	5406.15	0.906697	1.07796e-05	0.000590993
ENSG00000102935	ZNF423	389.622	-0.870409	0.000172192	0.00525174
ENSG00000103024	NME3	567.151	-0.720996	0.00278781	0.0348699
ENSG00000103152	MPG	981.073	-0.643733	0.000797794	0.0154539
ENSG00000103222	ABCC1	2304.17	-0.801697	0.000404646	0.00971057
ENSG00000103227	LMF1	301.954	-0.603956	0.00185471	0.0271017
ENSG00000103241	FOXF1	42.7429	-1.46679	0.000228399	0.00643747
ENSG00000103254	FAM173A	109.893	-0.843822	0.0035713	0.0410006
ENSG00000103257	SLC7A5	236.691	-1.12451	0.00167517	0.0252695
ENSG00000103313	MEFV	80.6224	-1.35536	0.0017907	0.0263497
ENSG00000103326	CAPN15	367.231	-0.780042	0.000218709	0.00624824
ENSG00000103494	RPGRIP1L	150.824	0.590255	0.0032064	0.0383636
ENSG00000103723	AP3B2	9.69709	-1.15943	0.00464951	0.0487276
ENSG00000104388	RAB2A	2559.72	0.655845	0.000302628	0.00779772
ENSG00000104408	EIF3E	5506.61	0.648818	8.5492e-05	0.00308978
ENSG00000104825	NFKBIB	437.156	-0.715744	2.64587e-07	2.42611e-05
ENSG00000104918	RETN	6.24763	-1.75336	5.1844e-05	0.00210159
ENSG00000104921	FCER2	13.8451	-1.4327	0.00107555	0.019058
ENSG00000104974	LILRA1	65.5662	-1.19018	0.00228686	0.0309404
ENSG00000105404	RABAC1	1649.75	-0.774845	3.65611e-05	0.00156675
ENSG00000105426	PTPRS	1369.9	-0.673189	7.36287e-08	7.5787e-06
ENSG00000105499	PLA2G4C	365.616	0.717736	0.00390644	0.043539
ENSG00000105520	DKFZP761J1410	875.515	-0.588901	0.000441742	0.0102949
ENSG00000105640	RPL18A	3187.33	-6.67738	3.7022e-214	3.887e-210
ENSG00000105656	ELL	395.346	-0.647316	0.0021794	0.0298715
ENSG00000105808	RASA4	215.99	3.02553	7.10017e-19	2.57051e-16
ENSG00000105829	BET1	245.178	0.604337	0.00300256	0.036827
ENSG00000105835	NAMPT	3079.55	-1.06132	0.00448654	0.0476281
ENSG00000105963	ADAP1	42.3243	-0.973871	0.0013444	0.0216986
ENSG00000105997	HOXA3	159.144	-1.1114	0.00135987	0.0218642
ENSG00000106034	CPED1	5330.73	0.83652	4.22806e-06	0.000264229
ENSG00000106123	EPHB6	619.892	-0.973989	0.000629687	0.0130525
ENSG00000106355	LSM5	336.183	0.620571	0.000397534	0.00959474
ENSG00000106483	SFRP4	2389.16	1.07078	0.00134775	0.0217359
ENSG00000106701	FSD1L	75.7178	0.885377	0.00119957	0.0201994
ENSG00000106809	OGN	19190.9	1.52145	4.61605e-09	5.76951e-07
ENSG00000106819	ASPN	7749.62	1.42807	9.21454e-09	1.09936e-06
ENSG00000106823	ECM2	4045.62	1.34572	5.57918e-11	8.67789e-09
ENSG00000107130	NCS1	2530.82	-0.586319	0.00104884	0.0186798
ENSG00000107404	DVL1	991.574	-0.694233	8.72521e-05	0.00313719
ENSG00000107679	PLEKHA1	1060.33	0.613643	0.000375259	0.00920859
ENSG00000107738	C10orf54	2259.41	-0.716499	0.00108475	0.0190926
ENSG00000107872	FBXL15	229.263	-1.01753	1.84528e-05	0.000899004
ENSG00000108231	LGI1	176.763	1.20324	2.32965e-06	0.000159863
ENSG00000108352	RAPGEFL1	73.4471	-0.834282	0.00270587	0.0344242
ENSG00000108423	TUBD1	175.596	0.63942	0.00139543	0.0223162
ENSG00000108556	CHRNE	28.6644	-1.27322	0.000658376	0.0135006
ENSG00000108669	CYTH1	900.253	-0.625346	0.000391239	0.00949738
ENSG00000108691	CCL2	1752.13	-1.05877	0.00314396	0.0379599
ENSG00000108819	PPP1R9B	1704.81	-0.610002	0.00201515	0.0284752
ENSG00000109072	VTN	25.1596	-1.25767	0.00124308	0.0206831
ENSG00000109674	NEIL3	13.9155	1.86895	1.84841e-06	0.000134301
ENSG00000110046	ATG2A	453.065	-0.631795	0.000557834	0.0119525
ENSG00000110057	UNC93B1	341.332	-0.681385	0.00200973	0.0284369
ENSG00000110315	RNF141	1609.13	0.61872	0.001527	0.0236607
ENSG00000110318	KIAA1377	465.447	0.713365	7.14259e-05	0.00271703
ENSG00000110697	PITPNM1	534.919	-0.705991	0.00277433	0.0347632
ENSG00000110719	TCIRG1	1130.52	-0.847754	0.000255412	0.00699235
ENSG00000110958	PTGES3	3864.82	0.746139	0.000272611	0.00728282
ENSG00000111087	GLI1	113.916	-1.04091	0.000608169	0.0127321
ENSG00000111262	KCNA1	27.6622	-1.5178	0.000385204	0.00938342
ENSG00000111339	ART4	577.623	1.22855	7.18064e-05	0.00272656
ENSG00000111424	VDR	226.423	-1.30153	2.60228e-07	2.39661e-05
ENSG00000111452	GPR133	455.249	-0.93103	0.0047631	0.0494148
ENSG00000111676	ATN1	4083.95	-0.595572	2.76438e-05	0.00125653
ENSG00000111684	LPCAT3	479.266	-1.03906	3.80449e-09	4.81245e-07
ENSG00000111711	GOLT1B	672.054	0.972579	0.00042426	0.00998723
ENSG00000111846	GCNT2	371.34	-1.14358	0.000264177	0.00717085
ENSG00000111850	SMIM8	74.663	0.621116	0.00386401	0.0431577
ENSG00000111859	NEDD9	3738.84	-0.925977	4.64817e-05	0.00190629
ENSG00000111911	HINT3	863.542	0.622739	0.000699936	0.0141592
ENSG00000112031	MTRF1L	664.662	1.09935	2.91686e-12	5.32594e-10
ENSG00000112053	SLC26A8	12.4146	-1.24226	0.00455157	0.048027
ENSG00000112186	CAP2	1483.12	0.741912	0.000161453	0.00500767
ENSG00000112195	TREML2	59.4062	-1.68998	0.000108885	0.00374199
ENSG00000112706	IMPG1	5.76804	1.62462	0.000203525	0.00592735
ENSG00000112787	FBRSL1	600.207	-0.609157	4.20026e-05	0.00176394
ENSG00000112893	MAN2A1	2218.82	0.631211	0.000138296	0.00444706
ENSG00000113140	SPARC	120931	0.732708	0.00365349	0.0414681
ENSG00000113328	CCNG1	1436.61	0.71978	0.000338225	0.00844478
ENSG00000113368	LMNB1	179.682	-1.2264	0.000597273	0.0125919
ENSG00000113504	SLC12A7	770.732	-0.688544	0.000747554	0.0147947
ENSG00000113578	FGF1	1350.15	0.999968	0.00220477	0.0301994
ENSG00000113758	DBN1	2497.38	-0.82497	8.54517e-05	0.00308978
ENSG00000113763	UNC5A	14.2547	1.37665	0.0016342	0.0248711
ENSG00000113810	SMC4	837.475	0.737468	0.000482138	0.0108451
ENSG00000114120	SLC25A36	935.091	0.70862	0.00187728	0.027242
ENSG00000114270	COL7A1	335.211	-1.10767	0.000548683	0.0118058
ENSG00000114698	PLSCR4	3401.23	0.748499	0.00137491	0.0220552
ENSG00000114737	CISH	187.68	-1.13989	0.000514881	0.0112975
ENSG00000114744	COMMD2	714.712	0.609491	5.08237e-05	0.00206421
ENSG00000114790	ARHGEF26	1219.86	1.01717	0.000172977	0.00525174
ENSG00000114796	KLHL24	745.017	0.586226	0.00285186	0.0352878
ENSG00000115252	PDE1A	1041.21	0.692671	9.9464e-06	0.000549617
ENSG00000115268	RPS15	2804.93	-0.828718	2.74884e-05	0.00125478
ENSG00000115286	NDUFS7	448.336	-0.596974	0.00233731	0.0313587
ENSG00000115365	LANCL1	1608.73	0.662613	0.000684194	0.0138938
ENSG00000115419	GLS	4641.78	0.773786	0.00114486	0.0197371
ENSG00000115525	ST3GAL5	196.322	-0.800761	0.001391	0.0222623
ENSG00000115607	IL18RAP	120.702	-1.37784	0.00162932	0.0248393
ENSG00000115756	HPCAL1	399.901	-0.74972	0.00368455	0.0416406
ENSG00000116001	TIA1	961.572	0.689414	0.000529479	0.0115093
ENSG00000116017	ARID3A	128.433	-1.06492	1.5289e-05	0.000782032
ENSG00000116514	RNF19B	618.862	-0.620246	0.0047063	0.0490679
ENSG00000116661	FBXO2	157.046	-1.06734	0.00243842	0.032162
ENSG00000116691	MIIP	275.583	-0.613973	0.00335967	0.0394233
ENSG00000116750	UCHL5	424.873	0.607738	0.00427824	0.0463064
ENSG00000116883	RP11-268J15.5	81.5909	0.637834	0.00117548	0.0199815
ENSG00000117143	UAP1	1475.38	-0.599434	0.00421772	0.045845
ENSG00000117298	ECE1	3589.24	-0.672688	0.000244495	0.00675477
ENSG00000117308	GALE	143.043	-0.62843	3.24061e-05	0.00142059
ENSG00000117533	VAMP4	865.81	0.671551	0.00169288	0.0254371
ENSG00000117616	C1orf63	1135.88	0.80292	3.09179e-06	0.000205448
ENSG00000117620	SLC35A3	455.616	0.729695	0.00199622	0.028418
ENSG00000118046	STK11	885.059	-0.589231	0.000572785	0.0121981
ENSG00000118363	SPCS2	753.597	-0.585558	2.81838e-05	0.00127544
ENSG00000118849	RARRES1	890.979	-1.35911	0.00187503	0.0272281
ENSG00000119396	RAB14	2068.27	0.605878	7.90599e-06	0.000451114
ENSG00000119508	NR4A3	677.395	-1.42241	0.00116425	0.0198879
ENSG00000119669	IRF2BPL	961.168	-0.794574	0.00110839	0.0193144
ENSG00000119673	ACOT2	305.352	-1.00415	1.99716e-05	0.000964053
ENSG00000119820	YIPF4	1161.74	0.596618	0.000303397	0.00779772
ENSG00000119878	CRIPT	205.755	0.614983	0.00278035	0.0348132
ENSG00000120149	MSX2	43.6499	-1.05241	6.32245e-05	0.00246254
ENSG00000120256	LRP11	566.266	0.859344	0.000627484	0.0130197
ENSG00000120594	PLXDC2	8191.83	0.587613	0.00420028	0.0457914
ENSG00000120696	KBTBD7	248.169	0.679814	0.00065028	0.0134183
ENSG00000120833	SOCS2	474.58	-1.0691	0.000532946	0.0115369
ENSG00000120949	TNFRSF8	23.3599	-0.973199	0.00213413	0.0294381
ENSG00000121005	CRISPLD1	7551.68	1.08179	0.000117373	0.00396237
ENSG00000121039	RDH10	348.905	-1.05541	1.87373e-05	0.000908399
ENSG00000121060	TRIM25	1229.87	-0.619055	0.00052765	0.0114934
ENSG00000121274	PAPD5	473.209	0.634096	0.00264006	0.033923
ENSG00000121904	CSMD2	124.592	-1.08107	0.00413729	0.0452237
ENSG00000122026	RPL21	4632.21	-5.41771	3.3831e-284	7.1037e-280
ENSG00000122435	TRMT13	184.55	0.67824	0.00144129	0.0226868
ENSG00000122481	RWDD3	49.2463	0.939001	0.000311854	0.00794698
ENSG00000122591	FAM126A	1350.91	0.651505	0.000487339	0.0109178
ENSG00000122694	GLIPR2	975.647	-0.60627	0.00078034	0.0152081
ENSG00000122884	P4HA1	1193.95	0.689377	0.00235221	0.0313936
ENSG00000122971	ACADS	275.867	-0.632202	0.000606788	0.0127159
ENSG00000123091	RNF11	3756.95	0.710534	0.000655813	0.0134788
ENSG00000123096	SSPN	1628.87	0.74803	0.001046	0.018661
ENSG00000123374	CDK2	495.486	-0.613775	1.22746e-07	1.21576e-05
ENSG00000123405	NFE2	110.002	-1.2487	0.00366212	0.0415097
ENSG00000123496	IL13RA2	404.967	0.809555	0.00315097	0.0379599
ENSG00000123570	RAB9B	288.26	0.717376	0.000207447	0.0059817
ENSG00000123575	FAM199X	881.958	0.655246	0.00336899	0.039495
ENSG00000123870	ZNF137P	76.0082	0.925176	6.43938e-05	0.00249473
ENSG00000123892	RAB38	70.7174	1.40128	0.00047678	0.0107998
ENSG00000124249	KCNK15	211.022	-1.09076	0.00337245	0.039495
ENSG00000124257	NEURL2	56.7149	-1.36286	4.38631e-06	0.000270893
ENSG00000124440	HIF3A	527.226	-1.1877	0.00276284	0.0346766
ENSG00000124588	NQO2	546.531	-0.669506	0.00287611	0.0355042
ENSG00000124749	COL21A1	4766.21	0.758341	0.00090808	0.0169794
ENSG00000124762	CDKN1A	4070.01	-1.23839	0.000162173	0.00501517
ENSG00000125347	IRF1	644.615	-1.17509	0.00040835	0.00977336
ENSG00000125505	MBOAT7	711.878	-0.585151	0.00217099	0.029795
ENSG00000125753	VASP	2898.15	-0.602104	0.000909686	0.0169891
ENSG00000125804	FAM182A	13.1187	1.43037	0.000140636	0.00451542
ENSG00000125869	LAMP5	58.0615	2.31621	3.64031e-09	4.63268e-07
ENSG00000125910	S1PR4	51.9053	-1.45354	0.000738607	0.0147596
ENSG00000125912	NCLN	715.624	-0.599373	0.000132585	0.00430381
ENSG00000125967	NECAB3	187.924	-0.782378	0.00147363	0.0230405
ENSG00000126016	AMOT	516.786	0.793402	0.00019673	0.0057752
ENSG00000126243	LRFN3	324.341	-0.585564	0.00361476	0.0412273
ENSG00000126759	CFP	104.438	-1.40385	0.000843035	0.0160345
ENSG00000126804	ZBTB1	923.588	0.604922	0.00139676	0.0223206
ENSG00000126814	TRMT5	304.944	0.662624	0.00030073	0.00778635
ENSG00000126838	PZP	19.1978	1.54579	2.38659e-05	0.00111363
ENSG00000127083	OMD	2969.49	0.938459	0.00404375	0.0445725
ENSG00000127241	MASP1	615.369	1.14189	0.00337852	0.0395441
ENSG00000127252	HRASLS	12.362	-1.35339	0.000366644	0.00902555
ENSG00000127314	RAP1B	977.288	-1.02372	6.49567e-06	0.000378878
ENSG00000127366	TAS2R5	8.25871	1.12696	0.00405159	0.0446162
ENSG00000127418	FGFRL1	1163.08	-0.97152	0.000334406	0.00839936
ENSG00000127589	TUBBP1	3.68114	1.37754	0.00113042	0.0195325
ENSG00000127989	MTERF	152.385	0.638962	0.000552985	0.0118728
ENSG00000127995	CASD1	351.201	0.81103	0.000972285	0.0178618
ENSG00000128000	ZNF780B	257.223	0.76142	0.00123719	0.0206178
ENSG00000128011	LRFN1	19.7903	-1.52069	2.21698e-06	0.000153638
ENSG00000128268	MGAT3	248.707	-1.11465	0.00234669	0.0313658
ENSG00000128284	APOL3	1025.66	-0.643455	0.00140431	0.0224206
ENSG00000128309	MPST	564.003	-0.677212	0.0042023	0.0457914
ENSG00000128591	FLNC	8326.13	-0.80681	0.00244412	0.0321765
ENSG00000128606	LRRC17	1446.66	0.796475	0.000713979	0.0143465
ENSG00000128609	NDUFA5	976.179	0.685255	0.000304108	0.00780643
ENSG00000129450	SIGLEC9	117.284	-1.09192	0.00335481	0.0393984
ENSG00000129515	SNX6	1447.06	0.673284	0.000191989	0.00569405
ENSG00000129534	MIS18BP1	333.813	0.65943	0.00103175	0.0184694
ENSG00000129682	FGF13	479.848	0.766384	0.000219649	0.00626655
ENSG00000129757	CDKN1C	341.166	-0.61802	0.00240729	0.0319117
ENSG00000129932	DOHH	181.513	-0.613318	0.00125944	0.0208892
ENSG00000129968	ABHD17A	805.66	-0.782995	8.57958e-05	0.00309543
ENSG00000130173	C19orf80	15.3853	-1.28282	0.00340524	0.0397379
ENSG00000130234	ACE2	14.9324	-1.34918	0.00206701	0.0289698
ENSG00000130429	ARPC1B	2133.61	-0.63353	0.00172708	0.0257549
ENSG00000130489	SCO2	177.611	-0.666085	0.00355599	0.0409127
ENSG00000130511	SSBP4	596.823	-0.992146	1.40787e-06	0.0001075
ENSG00000130522	JUND	2831.71	-0.719381	0.000359749	0.00890802
ENSG00000130589	HELZ2	468.898	-0.745667	0.00225203	0.0305874
ENSG00000130592	LSP1	1366.7	-0.859441	0.000942277	0.017431
ENSG00000130707	ASS1	1562.09	-0.722674	0.000394076	0.00954418
ENSG00000130748	TMEM160	87.2083	-1.03616	3.35191e-06	0.000219263
ENSG00000130787	HIP1R	709.511	-0.892181	0.00435827	0.0467629
ENSG00000130816	DNMT1	736.061	-0.70118	2.68418e-06	0.000178928
ENSG00000130844	ZNF331	910.167	-1.13452	0.00027973	0.00740704
ENSG00000130940	CASZ1	392.003	-0.610607	0.00465406	0.0487412
ENSG00000131095	GFAP	183.465	-2.00202	1.94356e-06	0.000138342
ENSG00000131171	SH3BGRL	4777.23	0.80875	0.000172934	0.00525174
ENSG00000131188	PRR7	13.8565	-1.08489	0.00234435	0.0313587
ENSG00000131389	SLC6A6	1240.32	-1.02482	3.77062e-05	0.00160599
ENSG00000131435	PDLIM4	671.101	-0.74655	0.000740956	0.0147657
ENSG00000131459	GFPT2	744.636	-1.27932	3.4517e-05	0.00149441
ENSG00000131462	TUBG1	321.774	-0.698167	0.000308445	0.00789845
ENSG00000131584	ACAP3	604.408	-0.585451	0.000417345	0.00990245
ENSG00000131591	C1orf159	113.654	-0.631851	0.00284657	0.0352521
ENSG00000131653	TRAF7	1107.28	-0.619498	6.88947e-07	5.65098e-05
ENSG00000132485	ZRANB2	1470.7	0.813489	7.4897e-05	0.00279838
ENSG00000132510	KDM6B	812.134	-0.87568	0.00240673	0.0319117
ENSG00000132967	HMGB1P5	153.322	-3.29701	8.60872e-72	3.01277e-68
ENSG00000133069	TMCC2	164.011	-0.771638	0.000396999	0.00959285
ENSG00000133107	TRPC4	71.9445	1.26231	1.83296e-05	0.000895082
ENSG00000133110	POSTN	6118.32	1.13617	0.00463519	0.0486648
ENSG00000133275	CSNK1G2	798.91	-0.614001	0.000112085	0.00383317
ENSG00000133794	ARNTL	209.661	-1.37414	4.26729e-06	0.000265889
ENSG00000133874	RNF122	293.952	-1.96763	1.19455e-15	3.13539e-13
ENSG00000134049	IER3IP1	238.264	1.16667	4.07464e-05	0.00171461
ENSG00000134152	KATNBL1	362.894	0.71097	0.00180772	0.026563
ENSG00000134259	NGF	229.513	-0.725009	0.00481425	0.0496987
ENSG00000134294	SLC38A2	5508.1	0.687525	0.00230809	0.0311473
ENSG00000134339	SAA2	56.6263	-1.65458	9.98079e-05	0.00351639
ENSG00000134343	ANO3	22.5382	1.13155	0.0025731	0.0332717
ENSG00000134369	NAV1	3933.43	-0.729058	0.000204986	0.00596162
ENSG00000134470	IL15RA	289.041	-0.790704	0.000825221	0.0157958
ENSG00000134802	SLC43A3	456.209	-0.612796	3.74702e-06	0.000242092
ENSG00000134873	CLDN10	5.88296	-1.28836	0.00323009	0.0385591
ENSG00000134970	TMED7	1106.53	1.2204	0.000235631	0.00657076
ENSG00000134986	NREP	1130.32	1.30253	1.53714e-05	0.000783421
ENSG00000135299	ANKRD6	1708.55	0.790028	1.478e-05	0.000764151
ENSG00000135338	LCA5	270.36	0.615097	0.0010001	0.0181035
ENSG00000135363	LMO2	565.341	-0.975782	1.48628e-05	0.000764926
ENSG00000135437	RDH5	51.1658	-0.786537	0.000290599	0.00761604
ENSG00000135486	HNRNPA1	7430.37	-1.40784	1.29858e-28	8.2629e-26
ENSG00000135535	CD164	4892.33	0.725407	0.00157573	0.0241884
ENSG00000135587	SMPD2	89.5592	-0.674316	0.000177017	0.00532586
ENSG00000135604	STX11	125.863	-0.872142	0.00181604	0.0266293
ENSG00000135709	KIAA0513	524.502	-0.865773	3.82485e-06	0.000245753
ENSG00000135750	KCNK1	54.8168	-0.912632	0.000504515	0.0111514
ENSG00000135916	ITM2C	3907.24	-1.07856	0.000184719	0.00552526
ENSG00000135940	COX5B	1296.13	-0.653538	4.03428e-06	0.00025439
ENSG00000136010	ALDH1L2	929.935	0.597888	0.00169355	0.0254371
ENSG00000136149	RPL13AP25	135.533	-1.08933	3.56306e-05	0.00153629
ENSG00000136153	LMO7	1965.27	0.883277	1.48593e-09	2.03931e-07
ENSG00000136156	ITM2B	12062.6	0.646972	0.000691274	0.0139975
ENSG00000136161	RCBTB2	572.152	0.681615	8.29042e-05	0.00301702
ENSG00000136169	SETDB2	320.173	0.597269	0.00226727	0.0307546
ENSG00000136237	RAPGEF5	1012.88	0.834199	0.00305172	0.037191
ENSG00000136305	CIDEB	197.659	-0.730057	0.000457177	0.0105047
ENSG00000136315	RP11-84C10.2	2.16727	-1.22949	0.00385719	0.0431044
ENSG00000136542	GALNT5	431.086	1.2175	0.000455728	0.0104927
ENSG00000136653	RASSF5	397.573	-0.874343	0.00421648	0.045845
ENSG00000136717	BIN1	493.64	-0.594426	0.00117665	0.0199815
ENSG00000136840	ST6GALNAC4	326.058	-0.725738	0.000716003	0.0143734
ENSG00000136877	FPGS	772.2	-0.602454	0.000920772	0.0171252
ENSG00000136999	NOV	21438.5	1.01375	0.000503637	0.0111501
ENSG00000137133	HINT2	269.208	-0.604872	0.000742626	0.0147667
ENSG00000137166	FOXP4	987.101	-0.673797	0.00300713	0.0368615
ENSG00000137193	PIM1	864.709	-1.68315	2.61898e-15	6.39459e-13
ENSG00000137203	TFAP2A	41.0555	-1.60262	0.000114633	0.00389492
ENSG00000137309	HMGA1	275.706	-0.924323	0.000235401	0.00657076
ENSG00000137404	NRM	260.162	-0.689052	0.0014501	0.0227913
ENSG00000137463	MGARP	64.5301	0.899148	0.000310678	0.00793626
ENSG00000137573	SULF1	15022.2	0.933391	0.000856249	0.016227
ENSG00000137745	MMP13	8.57363	1.85558	2.2485e-05	0.00105861
ENSG00000137821	LRRC49	208.782	0.598831	0.00057856	0.0122713
ENSG00000137831	UACA	3141	0.870819	1.26618e-06	9.77471e-05
ENSG00000137941	TTLL7	2117.55	0.620198	0.00314943	0.0379599
ENSG00000137970	RPL7P9	34.0834	1.18268	1.4314e-05	0.000747675
ENSG00000138031	ADCY3	1816.69	-0.67071	0.000729408	0.0146146
ENSG00000138036	DYNC2LI1	340.16	0.655874	0.000408658	0.00977336
ENSG00000138061	CYP1B1	982.155	-1.44568	0.00014761	0.00467499
ENSG00000138078	PREPL	2548.41	0.706124	4.3094e-05	0.00180257
ENSG00000138080	EMILIN1	6719.17	-0.721534	0.000443532	0.0103137
ENSG00000138182	KIF20B	141.725	0.941211	0.000522477	0.0114043
ENSG00000138356	AOX1	1278.07	-1.01608	0.00213322	0.0294381
ENSG00000138606	SHF	192.149	-0.752583	0.000958586	0.017672
ENSG00000138823	MTTP	54.7399	0.798367	0.00448271	0.0476281
ENSG00000139132	FGD4	773.961	0.737023	0.00334398	0.0393534
ENSG00000139182	CLSTN3	763.665	-0.760445	0.00234023	0.0313587
ENSG00000139193	CD27	25.0278	0.938186	0.00474501	0.0493411
ENSG00000139318	DUSP6	1387.13	0.618037	0.00121971	0.0204238
ENSG00000139324	TMTC3	561.387	0.630969	0.00456445	0.0480904
ENSG00000139508	SLC46A3	389.424	0.729734	0.000762096	0.0150258
ENSG00000139572	GPR84	34.373	-1.54307	0.000142065	0.00454046
ENSG00000139725	RHOF	64.8148	-0.698408	0.00251867	0.0328546
ENSG00000139880	CDH24	71.1888	-0.735988	0.00346436	0.0402794
ENSG00000139890	REM2	12.6151	-1.30755	0.00231026	0.0311566
ENSG00000139977	NAA30	451.755	0.611043	0.00405196	0.0446162
ENSG00000140368	PSTPIP1	250.428	-0.862068	0.000120971	0.00403841
ENSG00000140379	BCL2A1	103.994	-1.19625	0.0045379	0.0479551
ENSG00000140406	MESDC1	365.817	-0.978986	1.61378e-05	0.000812938
ENSG00000140470	ADAMTS17	79.4745	1.0905	0.000268429	0.00720937
ENSG00000140564	FURIN	2033.08	-0.700763	0.000543925	0.0117503
ENSG00000140839	CLEC18B	33.1655	-1.33443	0.000481183	0.0108451
ENSG00000140859	KIFC3	1058.65	-0.635237	0.00318471	0.0381635
ENSG00000140905	GCSH	23.849	-1.34164	0.000125009	0.00413376
ENSG00000140937	CDH11	3876.6	0.848562	0.00297203	0.0364951
ENSG00000140988	RPS2	8488.6	-0.662908	4.43634e-06	0.000272381
ENSG00000140993	TIGD7	267.576	0.59258	0.00200341	0.0284288
ENSG00000141401	IMPA2	160.011	-0.608379	0.00260665	0.0336001
ENSG00000141574	SECTM1	226.872	-1.2138	0.000266296	0.00719651
ENSG00000141905	NFIC	3409.21	-0.6729	0.000151205	0.00475299
ENSG00000141933	TPGS1	120.139	-1.41346	1.81068e-06	0.000132476
ENSG00000142089	IFITM3	13735.6	-0.848008	3.35447e-07	2.98463e-05
ENSG00000142188	TMEM50B	1024.56	0.663959	2.15453e-09	2.90006e-07
ENSG00000142235	LMTK3	81.8143	-1.1961	0.00217348	0.0298098
ENSG00000142409	ZNF787	244.498	-0.774198	7.55241e-06	0.000433294
ENSG00000142541	RPL13A	17111.2	-0.816522	6.7523e-07	5.56019e-05
ENSG00000142632	ARHGEF19	126.717	-1.32052	9.26422e-05	0.00329154
ENSG00000142634	EFHD2	888.427	-1.04595	2.05913e-05	0.000987161
ENSG00000142669	SH3BGRL3	3321.13	-0.895953	9.46132e-08	9.51014e-06
ENSG00000142694	EVA1B	451.992	-0.832778	0.00214493	0.0294885
ENSG00000142748	FCN3	18.4347	-1.81173	2.50392e-06	0.000168517
ENSG00000143127	ITGA10	5460.18	-0.917573	0.00398713	0.0442146
ENSG00000143248	RGS5	108277	0.854628	8.83778e-07	7.05611e-05
ENSG00000143546	S100A8	1905.82	-1.67189	0.000132611	0.00430381
ENSG00000143819	EPHX1	1451.39	-0.596919	0.0030165	0.0369547
ENSG00000143933	CALM2	9147.18	0.647081	0.000436467	0.0102059
ENSG00000143971	ETAA1	361.16	0.877788	0.000143322	0.00455981
ENSG00000144063	MALL	242.259	1.75953	2.52247e-09	3.33125e-07
ENSG00000144182	LIPT1	113.943	0.7179	3.94118e-05	0.00166513
ENSG00000144320	KIAA1715	753.567	0.618394	0.00312132	0.0377927
ENSG00000144331	ZNF385B	46.2671	-1.15177	0.00183636	0.0268898
ENSG00000144355	DLX1	24.2397	-1.25505	0.00400741	0.0443349
ENSG00000144426	NBEAL1	1106.27	0.91888	0.000104612	0.00361885
ENSG00000144476	ACKR3	2223.53	-1.11605	0.000109698	0.0037638
ENSG00000144485	HES6	86.9435	-0.921282	2.49364e-05	0.00115844
ENSG00000144642	RBMS3	2107	0.807193	4.99646e-05	0.00203325
ENSG00000144644	GADL1	78.5137	1.02593	0.00361135	0.0412273
ENSG00000144792	ZNF660	117.927	0.638957	0.000330772	0.00836814
ENSG00000144837	PLA1A	55.8915	-1.086	0.000990671	0.0180105
ENSG00000144857	BOC	1092.71	-0.879017	0.00248269	0.0325619
ENSG00000144908	ALDH1L1	682.177	-1.4783	0.000143579	0.00456106
ENSG00000145425	RPS3A	11743.1	-1.12272	3.69987e-23	1.84976e-20
ENSG00000145725	PPIP5K2	989.198	0.595975	0.00441795	0.0472255
ENSG00000145808	ADAMTS19	30.6914	1.37261	7.75913e-05	0.00287348
ENSG00000145911	N4BP3	68.4991	1.27663	0.000126003	0.00415355
ENSG00000146094	DOK3	253.34	-1.15274	0.0027423	0.0345859
ENSG00000146112	PPP1R18	2612.75	-0.667985	0.00408581	0.044853
ENSG00000146233	CYP39A1	55.5981	0.776864	0.00256318	0.0332027
ENSG00000146243	IRAK1BP1	114.551	0.765827	0.000939128	0.017431
ENSG00000146250	PRSS35	609.31	1.04575	1.43731e-05	0.000748899
ENSG00000146556	WASH2P	266.794	0.690016	0.000443136	0.0103137
ENSG00000147027	TMEM47	8869.09	0.871722	0.00108973	0.0191643
ENSG00000147082	CCNB3	4.72577	-1.30046	0.00271996	0.0344889
ENSG00000147400	CETN2	837.455	0.585263	0.000513483	0.0112975
ENSG00000147403	RPL10	16608.3	-1.24474	6.08688e-16	1.6599e-13
ENSG00000147443	DOK2	217.455	-0.798581	0.00443885	0.0473853
ENSG00000147604	RPL7	7357.11	-2.18852	3.75078e-50	4.37549e-47
ENSG00000147679	UTP23	390.885	0.611205	0.000273426	0.0072953
ENSG00000147813	NAPRT1	368.36	-0.749538	0.00207995	0.0290214
ENSG00000148180	GSN	55248.8	-0.739227	0.00356621	0.0409646
ENSG00000148339	SLC25A25	797.71	-0.843984	0.000280709	0.00742359
ENSG00000148344	PTGES	20.5234	-1.33005	0.000611929	0.0127854
ENSG00000148841	ITPRIP	1352.28	-0.800559	1.44509e-06	0.000109545
ENSG00000148950	IMMP1L	74.7458	0.594125	0.00376725	0.042302
ENSG00000149050	ZNF214	41.8173	0.869211	0.000345374	0.0086028
ENSG00000149084	HSD17B12	1973.53	0.727321	0.00132724	0.0214876
ENSG00000149091	DGKZ	785.719	-0.758199	2.98102e-07	2.69808e-05
ENSG00000149380	P4HA3	106.62	1.05182	0.00200375	0.0284288
ENSG00000149451	ADAM33	1914.48	-0.834699	0.00157136	0.0241884
ENSG00000149489	ROM1	324.624	-0.703222	0.00280429	0.0350089
ENSG00000149735	GPHA2	23.4851	-1.36927	0.00164227	0.0249449
ENSG00000149761	NUDT22	321.664	-0.592479	0.00366606	0.041521
ENSG00000149781	FERMT3	535.212	-0.970916	0.00262333	0.0337736
ENSG00000150687	PRSS23	8313.89	0.871874	1.10695e-05	0.00060404
ENSG00000151025	GPR158	4.97196	1.54248	0.000292501	0.00762972
ENSG00000151135	C12orf23	1105.22	0.725869	0.000708195	0.0142818
ENSG00000151150	ANK3	744.531	0.909602	0.000292387	0.00762972
ENSG00000151366	NDUFC2	183.74	0.733412	0.000110707	0.0037922
ENSG00000151490	PTPRO	512.13	0.595683	0.000128655	0.00420881
ENSG00000151572	ANO4	6.36324	1.33233	0.00100926	0.0181985
ENSG00000151655	ITIH2	20.5153	1.24757	0.00437578	0.046856
ENSG00000151743	AMN1	230.363	0.645583	0.000549304	0.0118058
ENSG00000151773	CCDC122	40.1354	1.29156	1.42914e-05	0.000747675
ENSG00000151948	GLT1D1	127.444	-1.91783	3.9821e-06	0.000252087
ENSG00000152082	MZT2B	789.758	-0.794846	0.0010775	0.019058
ENSG00000152193	RNF219	314.082	0.637691	0.0028437	0.0352521
ENSG00000152475	ZNF837	10.762	-1.12179	0.000817407	0.0156891
ENSG00000152503	TRIM36	375.18	1.24958	0.00161973	0.0247354
ENSG00000152527	PLEKHH2	675.063	0.716628	0.00354207	0.0408213
ENSG00000152763	WDR78	58.1731	0.737557	0.00326585	0.0387574
ENSG00000153130	SCOC	959.108	0.8913	0.000284969	0.00751731
ENSG00000153246	PLA2R1	1317.28	0.77796	9.25903e-05	0.00329154
ENSG00000153291	SLC25A27	212.435	0.767547	0.00116708	0.0199076
ENSG00000153666	GOLGA8I	39.6134	3.64878	5.74682e-20	2.19403e-17
ENSG00000153956	CACNA2D1	860.506	0.672542	0.00251601	0.0328546
ENSG00000153989	NUS1	935.475	0.825416	8.02457e-06	0.000456213
ENSG00000154027	AK5	88.4789	1.33838	8.15346e-05	0.00299331
ENSG00000154188	ANGPT1	1212.22	1.08754	2.33889e-05	0.00109625
ENSG00000154310	TNIK	248.298	0.913186	0.000133857	0.00433086
ENSG00000154359	LONRF1	547.678	0.64224	0.00453178	0.0479146
ENSG00000154556	SORBS2	4857.48	0.910872	7.03911e-05	0.00269721
ENSG00000154734	ADAMTS1	11381.6	-0.81115	0.00484745	0.0499252
ENSG00000154978	VOPP1	2017.13	0.714012	1.05289e-06	8.31153e-05
ENSG00000155903	RASA2	439.701	0.610241	0.00234466	0.0313587
ENSG00000155966	AFF2	47.2284	-1.58054	0.000239286	0.00664619
ENSG00000155970	MICU3	168.241	0.890032	0.000268832	0.00720937
ENSG00000155984	TMEM185A	376.536	1.18812	1.25628e-17	3.93723e-15
ENSG00000156136	DCK	286.201	0.850167	3.04713e-05	0.00135846
ENSG00000156162	DPY19L4	556.646	0.741144	0.00169293	0.0254371
ENSG00000156265	MAP3K7CL	1208.11	1.32522	2.24747e-05	0.00105861
ENSG00000156381	ANKRD9	101.487	-1.14085	5.89698e-06	0.000352777
ENSG00000156508	EEF1A1	91697.7	-1.54301	3.28564e-31	2.55526e-28
ENSG00000156689	GLYATL2	8.89864	-1.37095	0.00172349	0.0257396
ENSG00000157224	CLDN12	538.997	0.64308	0.00109769	0.0192238
ENSG00000157303	SUSD3	81.9275	-0.79236	0.00188001	0.0272627
ENSG00000157551	KCNJ15	149.526	-1.46959	0.000777207	0.0152081
ENSG00000157734	SNX22	10.9952	-1.38311	0.000831731	0.015877
ENSG00000157741	UBN2	577.002	0.599485	0.00234832	0.0313677
ENSG00000157927	RADIL	103.132	-0.873782	0.00116498	0.0198879
ENSG00000158427	TMSB15B	178.265	0.822426	2.74781e-05	0.00125478
ENSG00000158716	DUSP23	283.326	-0.967922	6.60508e-08	6.83219e-06
ENSG00000158764	ITLN2	10.3868	1.2497	0.00433207	0.0466393
ENSG00000158792	SPATA2L	175.339	-0.748161	0.00280624	0.0350089
ENSG00000158859	ADAMTS4	1251.94	-1.56749	0.000346283	0.00861523
ENSG00000158987	RAPGEF6	132.674	0.86644	0.000120409	0.00402604
ENSG00000159164	SV2A	954.413	-0.65079	0.00274547	0.0345859
ENSG00000159208	C1orf51	273.137	1.10302	0.00176443	0.0260912
ENSG00000159212	CLIC6	61.7864	-0.974281	0.00263425	0.0338727
ENSG00000159251	ACTC1	5282.65	-1.16963	0.00318053	0.0381628
ENSG00000159423	ALDH4A1	203.218	-0.714926	0.00142302	0.0225123
ENSG00000159496	RGL4	30.5756	-1.36681	0.00169655	0.0254508
ENSG00000159917	ZNF235	169.96	0.636276	0.000106676	0.00368419
ENSG00000160013	PTGIR	1128.05	-1.01448	1.25422e-05	0.000673556
ENSG00000160179	ABCG1	290.078	-0.756712	0.000222174	0.00633001
ENSG00000160200	CBS	414.654	-1.67539	2.12138e-06	0.000147989
ENSG00000160211	G6PD	907.747	-0.771281	1.68613e-08	1.9561e-06
ENSG00000160256	FAM207A	129.03	-0.728377	0.000452274	0.0104476
ENSG00000160410	SHKBP1	814.483	-0.782001	0.000224325	0.00636538
ENSG00000160685	ZBTB7B	1007.36	-0.909588	9.46575e-08	9.51014e-06
ENSG00000160712	IL6R	434.329	-0.967147	0.00403387	0.0445338
ENSG00000160883	HK3	307.182	-1.59662	0.000101285	0.00355648
ENSG00000160951	PTGER1	6.16449	-1.61358	0.000172864	0.00525174
ENSG00000160999	SH2B2	32.9859	-1.48446	3.28427e-06	0.00021551
ENSG00000161036	LRWD1	210.305	-0.795415	0.000414967	0.00988466
ENSG00000161048	NAPEPLD	320.525	0.705659	0.0031307	0.0378242
ENSG00000161618	ALDH16A1	216.506	-0.784633	0.000472579	0.0107256
ENSG00000161654	LSM12	360.554	0.935624	5.01974e-16	1.3869e-13
ENSG00000161714	PLCD3	1932.6	-0.654563	0.00216137	0.0296825
ENSG00000161847	RAVER1	188.716	-0.849125	2.86518e-05	0.00129105
ENSG00000162129	CLPB	172.375	-0.659254	0.00322249	0.0385002
ENSG00000162174	ASRGL1	82.1865	-0.847982	0.00138042	0.0221126
ENSG00000162493	PDPN	416.072	-1.56436	3.74624e-06	0.000242092
ENSG00000162542	TMCO4	440.869	-0.585208	0.00343374	0.0399899
ENSG00000162551	ALPL	321.329	-2.10835	4.21966e-07	3.65145e-05
ENSG00000162630	B3GALT2	30.6843	1.40755	2.57559e-06	0.000172237
ENSG00000162670	BRINP3	26.6086	-1.18589	0.00316051	0.0380189
ENSG00000162694	EXTL2	620.295	0.616149	0.00471358	0.0491195
ENSG00000162738	VANGL2	104.252	-1.15954	0.000291251	0.00761604
ENSG00000162804	SNED1	2964.35	-0.650622	7.24685e-05	0.00274179
ENSG00000162825	NBPF8	56.8744	0.993362	1.69042e-05	0.000845129
ENSG00000162881	OXER1	51.861	-0.75563	0.00108209	0.0190881
ENSG00000162927	PUS10	80.5795	0.693711	4.33981e-05	0.00181168
ENSG00000163026	C2orf44	243.88	0.586969	0.00475361	0.0493411
ENSG00000163041	H3F3A	1710.78	-2.53019	6.50054e-31	4.70684e-28
ENSG00000163132	MSX1	327.676	-1.32001	4.64557e-05	0.00190629
ENSG00000163220	S100A9	3957.53	-1.60777	0.000241178	0.00667228
ENSG00000163221	S100A12	249.31	-1.56483	0.000267357	0.00719907
ENSG00000163534	FCRL1	10.0082	-1.23441	0.00318483	0.0381635
ENSG00000163577	EIF5A2	349.495	0.628792	0.00326002	0.0387183
ENSG00000163682	RPL9	6743	-2.36602	2.91574e-09	3.7793e-07
ENSG00000163710	PCOLCE2	2790.29	-0.830497	0.00398812	0.0442146
ENSG00000163728	TTC14	761.339	0.857286	4.79599e-07	4.06779e-05
ENSG00000163749	CCDC158	56.0174	0.971597	0.00113193	0.0195325
ENSG00000163818	LZTFL1	411.148	0.737354	1.14321e-05	0.000621893
ENSG00000163874	ZC3H12A	377.51	-0.896532	0.00101892	0.0183179
ENSG00000163931	TKT	2479.92	-0.655052	0.00106529	0.0189247
ENSG00000163958	ZDHHC19	5.04254	-1.40899	0.00125332	0.020804
ENSG00000163975	MFI2	90.8769	-1.25769	3.91306e-06	0.000249737
ENSG00000164050	PLXNB1	2311	-0.66336	0.00186511	0.0271466
ENSG00000164066	INTU	254.798	0.66117	0.000141477	0.00452856
ENSG00000164096	C4orf3	4531.39	0.595086	0.0001015	0.0035581
ENSG00000164114	MAP9	534.911	0.805808	0.00172836	0.0257549
ENSG00000164118	CEP44	320.545	0.695834	0.000136249	0.00438796
ENSG00000164221	CCDC112	203.867	0.853323	0.000457747	0.0105047
ENSG00000164236	ANKRD33B	14.6886	-1.21669	0.000335379	0.00841019
ENSG00000164283	ESM1	141.297	1.66025	2.55205e-05	0.00117776
ENSG00000164284	GRPEL2	236.584	0.771097	0.000154147	0.0048289
ENSG00000164294	GPX8	1618.52	0.70665	0.00164414	0.0249449
ENSG00000164303	ENPP6	62.3845	-1.19653	0.00433055	0.0466393
ENSG00000164418	GRIK2	31.5522	1.23244	0.000287567	0.00756683
ENSG00000164620	RELL2	30.3493	-0.886616	0.00373292	0.0420064
ENSG00000164687	FABP5	289.586	-1.36469	1.36414e-07	1.32612e-05
ENSG00000164695	CHMP4C	258.337	-0.820516	0.0022194	0.0302834
ENSG00000164897	TMUB1	345.367	-0.597316	0.00269806	0.0343983
ENSG00000164932	CTHRC1	1220.99	0.812845	0.00100968	0.0181985
ENSG00000164949	GEM	6456.2	0.613223	0.00431656	0.0465564
ENSG00000164951	PDP1	955.92	0.688637	0.000154694	0.00483371
ENSG00000165029	ABCA1	773.045	-0.750689	0.00029948	0.00776357
ENSG00000165169	DYNLT3	1092.09	0.671345	0.00458829	0.048269
ENSG00000165197	FIGF	59.4617	-1.72661	4.29008e-05	0.00179807
ENSG00000165449	SLC16A9	98.5917	0.881817	0.00175445	0.0259985
ENSG00000165572	KBTBD6	299.498	0.69834	1.66628e-05	0.00083505
ENSG00000165637	VDAC2	1249.37	-0.923905	2.32111e-11	3.7782e-09
ENSG00000165644	COMTD1	94.3103	-1.01138	0.000215779	0.00617294
ENSG00000165801	ARHGEF40	1548.06	-0.634576	0.00036105	0.00892971
ENSG00000165802	NSMF	4404.7	-0.744718	0.00206537	0.0289698
ENSG00000165804	ZNF219	850.299	-0.930728	1.08898e-07	1.08888e-05
ENSG00000165874	FAM35BP	7.65772	2.99348	7.84158e-13	1.52461e-10
ENSG00000166165	CKB	738.737	-1.06641	0.0035586	0.0409127
ENSG00000166250	CLMP	2076.82	-0.747719	0.00194984	0.0280075
ENSG00000166268	MYRFL	20.4951	1.42333	0.000382976	0.00934
ENSG00000166275	C10orf32	365.503	0.655437	0.00305145	0.037191
ENSG00000166428	PLD4	34.3622	1.09577	0.00198389	0.0283202
ENSG00000166432	ZMAT1	385.452	0.928261	1.81587e-05	0.000890563
ENSG00000166664	CHRFAM7A	25.6	-1.09883	0.0011639	0.0198879
ENSG00000166669	ATF7IP2	110.259	0.816327	0.000177038	0.00532586
ENSG00000166922	SCG5	138.911	1.41278	9.35054e-06	0.000522188
ENSG00000167136	ENDOG	113.932	-0.759444	0.00443195	0.0473358
ENSG00000167157	PRRX2	755.287	-1.13446	0.000358686	0.00889219
ENSG00000167178	ISLR2	21.7876	1.1268	0.00175905	0.026036
ENSG00000167470	MIDN	1451.22	-1.05766	0.000431552	0.0101135
ENSG00000167487	KLHL26	259.446	-0.7854	0.0026936	0.0343622
ENSG00000167549	CORO6	192.673	-1.05873	0.00154791	0.0238642
ENSG00000167553	TUBA1C	2532.31	-0.602995	0.000565429	0.0120659
ENSG00000167680	SEMA6B	336.912	-1.05363	0.00174022	0.0258737
ENSG00000167700	MFSD3	69.0982	-0.694643	0.00062291	0.0129632
ENSG00000167705	RILP	158.356	-0.630977	0.000124619	0.00413077
ENSG00000167711	SERPINF2	99.878	-1.182	0.00336069	0.0394233
ENSG00000167994	RAB3IL1	478.239	-0.72039	0.000419946	0.00991903
ENSG00000167995	BEST1	117.465	-0.909595	0.000460199	0.0105379
ENSG00000167996	FTH1	31637.8	-0.66945	0.00011309	0.00385497
ENSG00000168028	RPSA	6029.82	-1.60498	1.4684e-22	6.70295e-20
ENSG00000168152	THAP9	74.6807	0.641161	0.00484728	0.0499252
ENSG00000168234	TTC39C	124.758	-0.685818	3.12317e-05	0.0013793
ENSG00000168255	POLR2J3	35.6348	0.914319	0.000222506	0.00633086
ENSG00000168283	BMI1	450.716	1.04063	0.00205934	0.0289266
ENSG00000168477	TNXB	5521.83	-0.856549	0.000747461	0.0147947
ENSG00000168490	PHYHIP	198.398	-1.38935	2.24435e-11	3.74023e-09
ENSG00000168491	CCDC110	40.9205	1.03811	0.000802203	0.0155107
ENSG00000168614	NBPF9	584.552	1.00961	4.69804e-12	8.43157e-10
ENSG00000168876	ANKRD49	263.343	0.616494	0.000170568	0.00522173
ENSG00000168993	CPLX1	39.0033	-1.22322	0.000780663	0.0152081
ENSG00000169026	MFSD7	121.32	-0.710078	0.000333364	0.00839187
ENSG00000169139	UBE2V2	829.739	0.609714	0.00447088	0.047614
ENSG00000169220	RGS14	181.539	-0.89367	0.0027083	0.0344242
ENSG00000169246	NPIPB3	68.4064	-1.02371	5.8663e-05	0.00232581
ENSG00000169255	B3GALNT1	610.666	0.860801	3.11062e-06	0.000206047
ENSG00000169282	KCNAB1	681.23	1.12004	8.3917e-05	0.00304333
ENSG00000169385	RNASE2	35.533	-1.74055	6.21763e-05	0.00243124
ENSG00000169519	METTL15	227.583	0.604781	0.000116001	0.00392869
ENSG00000169570	DTWD2	100.276	0.785862	0.000856068	0.016227
ENSG00000169604	ANTXR1	25627	1.01253	1.32512e-05	0.000708015
ENSG00000169689	STRA13	302.75	-0.656871	0.00206476	0.0289698
ENSG00000169692	AGPAT2	567.983	-0.795423	0.000520888	0.0113815
ENSG00000169710	FASN	1522.96	-1.2383	0.000141252	0.00452827
ENSG00000170161	RP11-262H14.4	44.2218	0.833831	0.00119631	0.0201769
ENSG00000170340	B3GNT2	547.079	0.744723	8.27596e-05	0.00301699
ENSG00000170412	GPRC5C	902.424	-1.03474	0.000263789	0.00717085
ENSG00000170417	TMEM182	52.4548	0.784424	0.000375396	0.00920859
ENSG00000170485	NPAS2	403.818	-0.989047	0.000377918	0.00925966
ENSG00000170525	PFKFB3	4301.21	-0.715514	0.00126211	0.0209005
ENSG00000170540	ARL6IP1	1235.45	0.671631	0.00237156	0.0315977
ENSG00000170577	SIX2	136.387	-0.906861	0.000532918	0.0115369
ENSG00000170629	DPY19L2P2	28.8931	1.06334	0.00039225	0.00951093
ENSG00000170638	TRABD	377.405	-0.753719	0.000545415	0.0117704
ENSG00000170667	RASA4B	10.2018	2.18041	2.74882e-07	2.50955e-05
ENSG00000170802	FOXN2	421.291	0.897371	0.000225848	0.00639132
ENSG00000170866	LILRA3	24.5614	-1.33877	0.00223541	0.0304404
ENSG00000170954	ZNF415	203.946	0.736719	0.000878375	0.0165715
ENSG00000170961	HAS2	182.306	-1.31123	0.00272422	0.0345014
ENSG00000171051	FPR1	815.18	-1.25174	0.0037185	0.0419115
ENSG00000171159	C9orf16	601.161	-0.78637	0.00285473	0.0353025
ENSG00000171222	SCAND1	379.642	-0.898885	0.000622268	0.0129632
ENSG00000171223	JUNB	7478.85	-0.970067	0.000978931	0.0179337
ENSG00000171236	LRG1	128.392	-1.84535	2.5103e-05	0.0011636
ENSG00000171282	RP11-1055B8.7	892.428	-0.900206	0.00210384	0.0291991
ENSG00000171291	ZNF439	181.895	0.660839	9.98565e-06	0.000550338
ENSG00000171448	ZBTB26	286.269	0.729807	0.000467381	0.0106559
ENSG00000171451	DSEL	1625.16	0.714586	8.59731e-06	0.000483985
ENSG00000171471	MAP1LC3B2	16.5323	1.37422	1.72831e-05	0.000856649
ENSG00000171729	TMEM51	151.208	0.740813	0.00348058	0.0403786
ENSG00000171777	RASGRP4	151.533	-1.21835	0.00150012	0.023333
ENSG00000171806	METTL18	113.285	0.757148	0.00207437	0.0289998
ENSG00000171817	ZNF540	163.29	0.854727	6.15964e-07	5.15299e-05
ENSG00000171864	PRND	20.722	2.54769	3.94209e-09	4.95664e-07
ENSG00000171873	ADRA1D	185.414	-1.36044	0.000555462	0.0119138
ENSG00000172062	SMN1	112.472	0.870067	0.000486137	0.0109059
ENSG00000172292	CERS6	609.578	0.70391	0.0032338	0.0385814
ENSG00000172346	CSDC2	1166.05	-0.721648	0.0019077	0.0275691
ENSG00000172348	RCAN2	10144.2	0.8387	2.63872e-05	0.00120978
ENSG00000172354	GNB2	2982.93	-0.628875	5.71198e-05	0.00228023
ENSG00000172469	MANEA	346.691	0.628516	0.00281578	0.0350478
ENSG00000172602	RND1	74.1022	-1.59525	0.000200867	0.00585807
ENSG00000172725	CORO1B	1171.71	-0.653625	2.85404e-05	0.0012888
ENSG00000172780	RAB43	29.9276	-0.795985	0.00365878	0.0415057
ENSG00000172935	MRGPRF	2556.7	-0.852579	0.00165856	0.0251091
ENSG00000173041	ZNF680	173.34	0.843816	0.000528987	0.0115093
ENSG00000173083	HPSE	156.411	-0.894732	0.00143294	0.0225892
ENSG00000173114	LRRN3	97.3373	1.39761	0.000223626	0.00635412
ENSG00000173137	ADCK5	83.9888	-0.780896	0.0015991	0.0244737
ENSG00000173153	ESRRA	369.163	-0.650377	0.000916959	0.0170846
ENSG00000173253	DMRT2	2.54492	-1.38809	0.00151393	0.0234955
ENSG00000173327	MAP3K11	761.95	-0.587716	0.00329513	0.0389565
ENSG00000173442	EHBP1L1	6633.41	-0.585918	7.23084e-05	0.00274067
ENSG00000173542	MOB1B	589.418	0.718912	0.00129845	0.0212414
ENSG00000173598	NUDT4	3376.43	1.78173	2.30329e-09	3.07661e-07
ENSG00000173638	SLC19A1	93.0654	-1.25233	1.09711e-06	8.53228e-05
ENSG00000173698	GPR64	148.429	-1.45373	0.000119635	0.00401292
ENSG00000174028	FAM3C2	22.3659	-2.52201	2.78692e-14	6.36083e-12
ENSG00000174276	ZNHIT2	78.8601	-1.03153	5.94696e-06	0.000354756
ENSG00000174353	STAG3L3	88.4559	0.812077	1.61505e-06	0.000119412
ENSG00000174370	C11orf45	102.319	0.916524	3.29399e-05	0.00144098
ENSG00000174374	WBSCR16	545.594	0.650246	0.000128681	0.00420881
ENSG00000174564	IL20RB	33.5976	-1.03666	0.00198265	0.0283202
ENSG00000174640	SLCO2A1	859.181	-1.25971	0.000335639	0.00841019
ENSG00000174796	THAP6	273.993	0.630207	0.000741168	0.0147657
ENSG00000174807	CD248	1088.26	-1.13439	0.00199975	0.0284288
ENSG00000174977	AC026271.5	39.4192	0.767316	0.00252785	0.0328906
ENSG00000175087	PDIK1L	164.377	0.680638	0.000892419	0.0167912
ENSG00000175344	CHRNA7	59.2695	1.97806	2.05208e-08	2.32916e-06
ENSG00000175356	SCUBE2	187.427	1.21458	1.79442e-07	1.70494e-05
ENSG00000175455	CCDC14	707.765	0.70986	0.000665948	0.0136292
ENSG00000175505	CLCF1	136.766	-1.01811	0.000234438	0.00656365
ENSG00000175556	LONRF3	89.2633	-0.623011	0.00349154	0.0404388
ENSG00000175592	FOSL1	166.063	-1.55843	1.39388e-05	0.000735393
ENSG00000175600	SUGCT	810.257	0.978764	1.55437e-06	0.000116152
ENSG00000175602	CCDC85B	629.714	-1.41072	2.23392e-07	2.0941e-05
ENSG00000175832	ETV4	45.2266	1.14436	0.000447426	0.0103698
ENSG00000176222	ZNF404	34.5772	1.29195	8.25839e-05	0.00301582
ENSG00000176788	BASP1	1100.58	-0.831329	4.62159e-05	0.00190282
ENSG00000176826	FKBP9L	37.6304	-1.26027	1.23265e-08	1.45411e-06
ENSG00000176887	SOX11	9.58477	1.39526	0.00135473	0.0218149
ENSG00000176956	LY6H	17.6372	1.31033	0.00276452	0.0346771
ENSG00000177084	POLE	598.232	-0.63397	0.00116337	0.0198879
ENSG00000177106	EPS8L2	634.433	-0.698097	0.000622711	0.0129632
ENSG00000177144	NUDT4P1	17.5592	-1.46454	0.00019573	0.00577061
ENSG00000177156	TALDO1	1713.4	-0.707515	1.71523e-05	0.000853467
ENSG00000177426	TGIF1	539.94	-0.654089	0.000764573	0.0150605
ENSG00000177485	ZBTB33	316.777	0.665635	0.00118349	0.0200415
ENSG00000177565	TBL1XR1	2060.33	0.791674	0.00118489	0.0200415
ENSG00000177663	IL17RA	1008.84	-1.03346	1.10751e-05	0.00060404
ENSG00000177666	PNPLA2	1740.47	-0.67559	0.00262259	0.0337736
ENSG00000177674	AGTRAP	416.353	-0.712743	3.83941e-05	0.00163198
ENSG00000177683	THAP5	393.104	0.716526	9.72328e-05	0.00343142
ENSG00000177853	ZNF518A	457.942	0.803695	0.000155267	0.00484444
ENSG00000177954	RPS27	7942.3	-1.84509	9.63196e-29	6.32037e-26
ENSG00000177989	ODF3B	106.62	-1.1339	0.00026505	0.00717606
ENSG00000178115	GOLGA8Q	9.68357	2.14504	5.93969e-08	6.26742e-06
ENSG00000178162	FAR2P2	60.1082	1.3788	1.34402e-08	1.57663e-06
ENSG00000178201	VN1R1	3.21456	1.2737	0.00316311	0.0380189
ENSG00000178209	PLEC	10714.8	-0.833366	9.48861e-06	0.000527095
ENSG00000178226	PRSS36	51.4109	-0.833288	0.0044602	0.0475408
ENSG00000178295	GEN1	88.2683	1.29115	6.00799e-05	0.0023669
ENSG00000178458	H3F3AP6	55.8241	-2.31644	2.25377e-17	6.85866e-15
ENSG00000178464	CTD-2192J16.15	710.593	2.02462	5.7421e-09	7.05102e-07
ENSG00000178660	ARMC10P1	3.02707	-1.30063	0.00288346	0.035574
ENSG00000178752	FAM132B	61.5687	-1.50344	0.000124218	0.00412711
ENSG00000178789	CD300LB	29.266	-1.11235	0.00429553	0.04644
ENSG00000178809	TRIM73	8.69903	1.08909	0.00470339	0.049062
ENSG00000178814	OPLAH	51.9598	-1.27526	5.87046e-05	0.00232581
ENSG00000178927	C17orf62	977.637	-0.658091	0.000472992	0.0107256
ENSG00000179083	FAM133A	40.7627	0.68733	0.00203485	0.0286777
ENSG00000179242	CDH4	5.0564	-1.32572	0.00228448	0.0309281
ENSG00000179277	MEIS3P1	203.674	-0.72618	0.000507792	0.0112002
ENSG00000179588	ZFPM1	44.0208	-0.856728	0.000796894	0.0154539
ENSG00000179604	CDC42EP4	1523.53	-0.740798	0.00253418	0.0329491
ENSG00000179627	ZBTB42	117.789	-0.683945	0.00337086	0.039495
ENSG00000179750	APOBEC3B	10.2341	-1.18824	0.0046736	0.0488483
ENSG00000179899	PHC1P1	49.729	-3.69115	2.09852e-32	1.76258e-29
ENSG00000179909	ZNF154	76.1718	0.92263	0.00238615	0.0317116
ENSG00000179941	BBS10	304.579	0.969664	8.22836e-05	0.00301009
ENSG00000179954	SSC5D	774.544	-1.25051	0.000179072	0.00537165
ENSG00000179965	ZNF771	101.59	-0.79897	0.000740876	0.0147657
ENSG00000179967	PPP1R14BP3	47.5507	-3.7902	3.39735e-35	3.24261e-32
ENSG00000179978	RP11-1319K7.1	12.9264	-1.51454	0.000421187	0.00993716
ENSG00000180015	RP11-756P10.3	10.85	-2.85915	5.24005e-12	9.24626e-10
ENSG00000180139	ACTA2-AS1	21.703	-1.63074	9.82093e-06	0.000544116
ENSG00000180316	PNPLA1	5.1567	-1.56366	0.000337664	0.0084408
ENSG00000180346	TIGD2	45.6978	0.756842	0.000833245	0.0158914
ENSG00000180389	ATP5EP2	2.69758	1.53777	0.000448724	0.010377
ENSG00000180481	GLIPR1L2	35.2432	1.57515	2.46955e-05	0.00114979
ENSG00000180509	KCNE1	22.2274	-1.28231	0.00274902	0.0345859
ENSG00000180549	FUT7	25.9194	-1.49247	0.00056047	0.0119845
ENSG00000180581	SRP9P1	28.7637	-2.61339	1.40838e-15	3.52062e-13
ENSG00000180628	PCGF5	3774.29	0.778607	0.00237778	0.0316404
ENSG00000180914	OXTR	171.86	1.40376	0.000900238	0.0168779
ENSG00000180957	PITPNB	1825.42	1.30344	2.356e-21	1.05258e-18
ENSG00000181524	RPL24P4	14.651	3.16057	4.06468e-17	1.18542e-14
ENSG00000181790	BAI1	35.8205	-1.0988	0.00133532	0.0215685
ENSG00000181826	RELL1	107.328	-0.857132	4.36751e-05	0.00181602
ENSG00000181856	SLC2A4	85.1435	-1.12078	0.00270723	0.0344242
ENSG00000182010	RTKN2	9.84129	1.21636	0.00280853	0.0350089
ENSG00000182050	MGAT4C	31.7825	1.37087	0.00118542	0.0200415
ENSG00000182087	TMEM259	2112.51	-0.60837	0.000836691	0.0159416
ENSG00000182168	UNC5C	601.133	0.816041	7.55469e-08	7.73822e-06
ENSG00000182175	RGMA	770.094	-1.0954	3.9088e-05	0.00165478
ENSG00000182217	HIST2H4B	4.65007	-1.85102	2.03881e-05	0.000980924
ENSG00000182263	FIGN	417.038	0.78171	0.000779214	0.0152081
ENSG00000182310	SPACA6P	106.856	-0.939004	0.000211448	0.00607508
ENSG00000182359	KBTBD3	125.642	0.679035	0.00115992	0.0198824
ENSG00000182484	WASH6P	22.7175	2.19727	1.57375e-14	3.71299e-12
ENSG00000182487	NCF1B	27.2971	-1.18173	0.00449164	0.0476444
ENSG00000182500	ORAI1	179.603	-1.09183	3.75051e-07	3.32292e-05
ENSG00000182502	ABHD17AP5	5.6244	1.97943	3.98575e-06	0.000252087
ENSG00000182508	LHFPL1	38.1141	1.27194	0.000297468	0.00773048
ENSG00000182552	RWDD4	560.58	0.843873	5.39296e-08	5.71926e-06
ENSG00000182566	CLEC4G	39.6133	-1.29021	0.00248521	0.0325746
ENSG00000182628	SKA2	572.369	0.72766	1.21239e-05	0.00065613
ENSG00000182646	FAM156A	33.0502	-1.81062	2.54812e-09	3.34409e-07
ENSG00000182700	IGIP	588.443	0.640385	0.00281073	0.0350089
ENSG00000182768	NGRN	531.342	-0.702817	5.87261e-06	0.000352323
ENSG00000182841	RRP7B	139.527	1.03953	1.18105e-06	9.15119e-05
ENSG00000182885	GPR97	193.138	-1.29377	0.0028647	0.0353841
ENSG00000183019	C19orf59	75.6378	-1.5084	0.00026742	0.00719907
ENSG00000183023	SLC8A1	608.93	1.00121	0.000118282	0.00398025
ENSG00000183044	ABAT	407.733	-0.907282	0.000897011	0.0168625
ENSG00000183072	NKX2-5	4.12737	1.75856	5.98181e-05	0.00236102
ENSG00000183196	CHST6	91.0382	-0.716967	0.00026857	0.00720937
ENSG00000183281	PLGLB1	14.7369	1.85085	7.83719e-07	6.3785e-05
ENSG00000183298	RP11-556K13.1	88.0241	-2.14934	1.42518e-13	2.96297e-11
ENSG00000183340	JRKL	453.921	0.625726	0.000779975	0.0152081
ENSG00000183458	RP11-958N24.1	139.338	-1.27654	1.518e-07	1.46215e-05
ENSG00000183474	GTF2H2C	105.421	0.761807	0.00098926	0.0180105
ENSG00000183558	HIST2H2AA3	6.1029	-1.49868	0.00020767	0.0059817
ENSG00000183570	PCBP3	87.7217	-1.10303	7.61604e-06	0.000435754
ENSG00000183666	GUSBP1	137.705	0.72011	0.00362171	0.0412636
ENSG00000183762	KREMEN1	575.927	-0.942049	6.07523e-09	7.41484e-07
ENSG00000183844	FAM3B	25.1885	-1.64459	2.50156e-07	2.314e-05
ENSG00000184160	ADRA2C	1120.11	-1.07208	0.00412836	0.0451529
ENSG00000184163	FAM132A	7.69769	-1.27504	0.00230074	0.0310682
ENSG00000184206	GOLGA6L4	34.2338	1.14141	0.00170727	0.0255701
ENSG00000184216	IRAK1	1307.59	-0.591178	0.000706315	0.0142745
ENSG00000184227	ACOT1	59.1491	-1.59366	1.55091e-05	0.000788524
ENSG00000184292	TACSTD2	79.9757	-1.09273	0.000512844	0.0112975
ENSG00000184319	RPL23AP82	418.993	0.736862	1.81369e-07	1.71549e-05
ENSG00000184451	CCR10	19.7189	-1.15064	0.000583652	0.0123419
ENSG00000184557	SOCS3	3073.29	-1.17815	0.00145617	0.0228696
ENSG00000184588	PDE4B	328.377	-1.08112	0.00267681	0.0342229
ENSG00000184612	RPL7P26	2.4147	1.47702	0.000602015	0.0126411
ENSG00000184640	SEPT9	2846.92	-0.597498	1.73386e-05	0.000856649
ENSG00000184730	APOBR	214.412	-1.11657	0.00373622	0.042021
ENSG00000184779	RPS17	4.07567	1.71497	8.70381e-05	0.00313487
ENSG00000184828	ZBTB7C	380.446	-0.967923	5.60204e-05	0.00224488
ENSG00000184838	PRR16	268.507	0.765345	0.00444569	0.0474342
ENSG00000184897	H1FX	1045.03	-0.608449	0.00186553	0.0271466
ENSG00000184898	RBM43	400.541	0.91324	9.57818e-05	0.00339161
ENSG00000184922	FMNL1	524.724	-1.03436	0.00399877	0.0442859
ENSG00000184986	TMEM121	31.0558	-1.0869	0.00188985	0.0273677
ENSG00000185000	DGAT1	333.693	-0.621849	0.00117388	0.019975
ENSG00000185022	MAFF	1806.01	-0.944878	1.73716e-09	2.35335e-07
ENSG00000185164	NOMO2	623.643	-0.984938	4.685e-13	9.36911e-11
ENSG00000185187	SIGIRR	271.691	-0.702461	0.000254822	0.00698531
ENSG00000185246	PRPF39	416.131	0.673733	0.00017566	0.00530721
ENSG00000185304	RGPD2	14.388	-1.24847	0.00421814	0.045845
ENSG00000185338	SOCS1	46.9178	-0.908658	0.00246968	0.0324114
ENSG00000185340	GAS2L1	545.522	-0.6444	0.00274829	0.0345859
ENSG00000185386	MAPK11	242.857	-0.659751	0.00408629	0.044853
ENSG00000185561	TLCD2	34.7902	-0.965192	0.00354593	0.0408434
ENSG00000185596	WASH3P	272.267	-0.729014	0.000979615	0.0179337
ENSG00000185641	CTD-2287O16.1	22.3223	1.07083	7.61891e-05	0.00283154
ENSG00000185829	ARL17A	72.6526	2.77902	3.00578e-20	1.19086e-17
ENSG00000185834	RPL12P4	12.4309	0.961961	0.00325722	0.0387069
ENSG00000185946	RNPC3	214.049	0.680603	0.00204415	0.0287881
ENSG00000185990	F8A3	11.347	-2.81815	1.17479e-12	2.24257e-10
ENSG00000186017	ZNF566	218.065	0.650825	0.00182781	0.0267832
ENSG00000186020	ZNF529	279.516	0.62064	0.00142878	0.0225405
ENSG00000186063	AIDA	1594.62	0.906359	8.43949e-07	6.80181e-05
ENSG00000186076	RP11-887P2.3	68.8657	-2.96179	1.24699e-32	1.09101e-29
ENSG00000186111	PIP5K1C	2500.3	-0.684038	0.00035456	0.00880029
ENSG00000186130	ZBTB6	271.906	0.795447	0.00211749	0.0292713
ENSG00000186132	C2orf76	115.362	0.586273	4.40582e-05	0.00182833
ENSG00000186260	MKL2	960.904	-0.607702	0.00268493	0.0342725
ENSG00000186275	NBPF12	205.255	0.71386	0.000186431	0.00556064
ENSG00000186399	GOLGA8R	46.5656	0.986378	0.00122483	0.0204606
ENSG00000186407	CD300E	139.009	-1.5981	0.000152892	0.00479884
ENSG00000186446	ZNF501	129.009	0.693335	0.00334536	0.0393534
ENSG00000186687	LYRM7	332.168	0.771232	0.000478169	0.0108126
ENSG00000187116	LILRA5	121.836	-1.71439	9.09787e-05	0.00325446
ENSG00000187243	MAGED4B	5.34403	-2.39717	2.89347e-08	3.181e-06
ENSG00000187479	C11orf96	7226.31	-1.22892	3.80734e-07	3.3591e-05
ENSG00000187653	TMSB4XP8	384.241	-1.25358	4.76624e-18	1.5886e-15
ENSG00000187758	ADH1A	128.43	-5.04948	5.29842e-55	7.94687e-52
ENSG00000187867	PALM3	14.3927	1.17744	0.00198966	0.0283439
ENSG00000187942	LDLRAD2	15.9444	-1.14708	0.0010336	0.0184868
ENSG00000188015	S100A3	51.0721	-0.784174	0.0025427	0.0330189
ENSG00000188130	MAPK12	136.318	-0.756869	0.00210339	0.0291991
ENSG00000188227	ZNF793	180.64	0.787399	0.0004786	0.0108126
ENSG00000188372	ZP3	18.6399	-1.52936	0.000382103	0.00932954
ENSG00000188459	WASF4P	10.2711	-2.70289	1.25524e-11	2.1429e-09
ENSG00000188483	IER5L	672.305	-1.28596	0.000324218	0.00823208
ENSG00000188529	SRSF10	341.512	1.79708	1.03853e-17	3.35492e-15
ENSG00000188566	NDOR1	155.266	-0.615677	0.000653956	0.0134625
ENSG00000188611	ASAH2	11.1732	1.07291	0.00389525	0.0434374
ENSG00000188626	GOLGA8M	17.5214	1.25756	0.000331367	0.0083731
ENSG00000188686	SCXA	23.7094	3.48779	3.23246e-18	1.11271e-15
ENSG00000188766	SPRED3	40.0297	-1.16609	0.00156135	0.0240538
ENSG00000188801	ZNF322P1	3.72574	-1.32615	0.00200119	0.0284288
ENSG00000188856	RPSAP47	26.3705	-1.85887	2.19208e-05	0.0010367
ENSG00000188897	CTD-3088G3.8	100.372	-1.4016	0.000114566	0.00389492
ENSG00000188921	PTPLAD2	508.375	0.996348	0.000569054	0.012131
ENSG00000189152	GRAPL	2.9603	1.39688	0.00141825	0.0224979
ENSG00000189292	FAM150B	33.002	-1.16596	0.00436548	0.0467924
ENSG00000189339	SLC35E2B	1528.54	0.918353	0.000373673	0.00918782
ENSG00000189343	RPS2P46	29.0245	-1.17158	0.000235068	0.00657076
ENSG00000196139	AKR1C3	1344.47	-0.599171	0.000876792	0.0165565
ENSG00000196189	SEMA4A	170.759	-1.0281	0.0036009	0.041138
ENSG00000196233	LCOR	254.725	0.652682	0.00264907	0.0339593
ENSG00000196268	ZNF493	165.35	0.937348	0.000585604	0.0123707
ENSG00000196358	NTNG2	29.5992	-1.38335	6.78175e-05	0.00260812
ENSG00000196381	ZNF781	69.3863	1.19834	4.06101e-06	0.000255309
ENSG00000196387	ZNF140	263.597	0.913086	6.51763e-07	5.40938e-05
ENSG00000196458	ZNF605	199.06	0.635059	0.00025762	0.00703447
ENSG00000196498	NCOR2	2581.08	-0.841476	1.22765e-05	0.000662677
ENSG00000196517	SLC6A9	249.953	-0.774661	0.000532417	0.0115369
ENSG00000196648	GOLGA6L20	4.84298	1.27424	0.0035973	0.0411192
ENSG00000196678	ERI2	151.258	0.791604	1.87754e-05	0.000908399
ENSG00000196724	ZNF418	74.1316	0.895325	1.81947e-05	0.000890563
ENSG00000196741	CXorf24	35.0764	0.84698	0.000190899	0.00566974
ENSG00000196843	ARID5A	3626.78	-1.23965	0.000252877	0.00695013
ENSG00000196873	CBWD3	44.8783	0.913737	0.00273863	0.0345859
ENSG00000197019	SERTAD1	619.154	-0.599016	0.0048165	0.0496987
ENSG00000197044	ZNF441	388.589	0.878881	7.92679e-05	0.00292012
ENSG00000197070	ARRDC1	261.89	-0.606073	0.000503403	0.0111501
ENSG00000197121	PGAP1	353.701	0.743727	0.00147506	0.0230457
ENSG00000197122	SRC	1601.8	-0.700043	0.00067366	0.0137335
ENSG00000197128	ZNF772	112.524	0.88028	1.46236e-06	0.00011006
ENSG00000197208	SLC22A4	46.086	-1.20663	0.000234312	0.00656365
ENSG00000197245	FAM110D	113.448	-1.34369	0.000639428	0.0132153
ENSG00000197249	SERPINA1	764.732	-1.17385	0.0029567	0.0363281
ENSG00000197258	EIF4BP6	24.0632	1.65389	1.31077e-07	1.28017e-05
ENSG00000197262	CCL4L2	4.26753	1.27094	0.00372416	0.0419528
ENSG00000197324	LRP10	8408.18	-0.587274	0.000198549	0.00580659
ENSG00000197380	DACT3	2965.43	-0.859871	0.00121873	0.0204238
ENSG00000197483	ZNF628	67.1383	-1.16131	1.74595e-06	0.000128637
ENSG00000197530	MIB2	441.456	-0.72758	0.000964841	0.0177561
ENSG00000197561	ELANE	6.96546	-1.43071	0.000864557	0.0163549
ENSG00000197582	GPX1P1	21.0303	-1.76496	3.33292e-05	0.00145196
ENSG00000197701	ZNF595	54.5521	-1.18693	0.000348648	0.00866381
ENSG00000197728	RPS26	1213.62	-5.08135	5.0535e-107	2.1223e-103
ENSG00000197766	CFD	2128.33	-1.60606	2.54173e-05	0.00117558
ENSG00000197769	MAP1LC3C	41.0046	-1.23024	0.00421029	0.045845
ENSG00000197808	ZNF461	136.92	0.66262	0.000976893	0.017925
ENSG00000197852	FAM212B	446.371	-0.714176	0.00117712	0.0199815
ENSG00000198040	ZNF84	89.2222	2.76035	3.72606e-18	1.26193e-15
ENSG00000198046	ZNF667	133.954	0.770118	7.40155e-05	0.00277532
ENSG00000198053	SIRPA	1627.32	-0.669175	0.00181467	0.0266279
ENSG00000198055	GRK6	571.869	-0.714704	0.000121957	0.00406483
ENSG00000198106	SNX29P2	14.1492	1.36664	1.70835e-05	0.000852065
ENSG00000198130	HIBCH	682.342	0.687675	5.51667e-06	0.000331917
ENSG00000198134	RP11-267J23.4	12.8928	2.63136	4.61326e-13	9.31435e-11
ENSG00000198146	ZNF770	733.274	0.667263	0.0036919	0.0416788
ENSG00000198182	ZNF607	153.658	0.585168	0.00169836	0.0254548
ENSG00000198216	CACNA1E	6.21278	-1.45436	0.000826588	0.0158076
ENSG00000198242	RPL23A	6128.32	-0.980318	1.05232e-09	1.45373e-07
ENSG00000198252	STYX	410.508	0.656536	0.00340643	0.0397379
ENSG00000198355	PIM3	853.033	-0.861429	0.000206986	0.0059817
ENSG00000198393	ZNF26	18.0775	2.44371	5.7184e-13	1.13278e-10
ENSG00000198406	BZW1P2	42.1908	-3.34113	1.40604e-27	7.57027e-25
ENSG00000198420	FAM115A	913.856	0.871935	6.34184e-08	6.62518e-06
ENSG00000198440	ZNF583	143.341	0.61685	0.00151099	0.0234672
ENSG00000198576	ARC	40.93	-1.27913	0.000264322	0.00717085
ENSG00000198624	CCDC69	1638.19	-1.03512	0.00095545	0.0176296
ENSG00000198626	RYR2	1394.4	-0.70567	0.000412093	0.00984429
ENSG00000198695	MT-ND6	2119.49	-0.631762	0.000196926	0.0057752
ENSG00000198712	MT-CO2	70310.4	-0.751457	3.63432e-06	0.000236999
ENSG00000198727	MT-CYB	104306	-0.815259	0.000650532	0.0134183
ENSG00000198734	F5	81.3182	-1.33122	0.00100443	0.0181507
ENSG00000198736	MSRB1	728.682	-0.760156	0.000206614	0.0059817
ENSG00000198753	PLXNB3	261.005	-0.773999	0.00302961	0.0370614
ENSG00000198763	MT-ND2	60377.7	-1.2084	2.315e-09	3.07661e-07
ENSG00000198804	MT-CO1	190487	-0.727147	5.44499e-05	0.00219451
ENSG00000198805	PNP	578.168	-0.905807	0.00211401	0.0292425
ENSG00000198816	ZNF358	733.042	-0.739785	0.000772855	0.0151667
ENSG00000198830	HMGN2	2555.45	0.817623	5.98849e-08	6.28732e-06
ENSG00000198832	SELM	4105.18	-0.826737	1.53069e-05	0.000782032
ENSG00000198858	R3HDM4	813.148	-0.907714	1.42759e-06	0.000108611
ENSG00000198862	LTN1	911.894	0.635801	0.00209258	0.0291379
ENSG00000198886	MT-ND4	161337	-0.599921	3.67661e-05	0.00157233
ENSG00000198888	MT-ND1	60426.9	-0.911689	6.24253e-06	0.000370026
ENSG00000198899	MT-ATP6	53017.8	-0.735438	4.42686e-06	0.000272381
ENSG00000198938	MT-CO3	93166.4	-0.714536	8.22249e-05	0.00301009
ENSG00000198948	MFAP3L	531.729	-0.65175	0.00405427	0.0446182
ENSG00000201185	RNA5SP202	9.32499	2.27402	1.7776e-07	1.69664e-05
ENSG00000203326	ZNF525	123.785	0.66776	0.00126863	0.0209636
ENSG00000203668	CHML	511.497	0.772477	0.00355975	0.0409127
ENSG00000203815	FAM231D	32.8719	1.42152	5.77234e-05	0.0022956
ENSG00000203827	NBPF16	89.612	2.41892	2.08214e-14	4.80448e-12
ENSG00000203836	NBPF24	91.6125	3.33365	3.99345e-36	3.99307e-33
ENSG00000203837	PNLIPRP3	7.56777	-1.58716	0.000271126	0.00726162
ENSG00000203965	EFCAB7	126.104	0.738792	0.000634648	0.0131294
ENSG00000203999	RP11-290F20.1	17.1835	-1.46935	0.000731117	0.0146349
ENSG00000204150	CTGLF11P	10.2252	1.35843	0.000547418	0.0118015
ENSG00000204152	TIMM23B	6.00112	-2.08124	4.13297e-07	3.601e-05
ENSG00000204172	AGAP10	33.9157	2.6196	1.54338e-12	2.89356e-10
ENSG00000204177	BMS1P1	9.27839	1.96187	2.28668e-06	0.000157429
ENSG00000204352	C9orf129	3.05781	-1.30766	0.00274536	0.0345859
ENSG00000204370	SDHD	664.316	0.828685	0.000844156	0.0160413
ENSG00000204577	LILRB3	44.2428	-1.20349	0.00480598	0.0496634
ENSG00000204632	HLA-G	12.8338	2.0656	4.8237e-07	4.06779e-05
ENSG00000204740	MALRD1	16.3982	0.97149	0.00271833	0.0344889
ENSG00000204899	MZT1	194.603	0.692094	0.00436066	0.0467647
ENSG00000204933	CD177P1	2.52313	-1.29352	0.00176803	0.0261077
ENSG00000204936	CD177	115.77	-1.96567	5.31814e-06	0.000322747
ENSG00000205078	SYCE1L	19.0261	-0.965231	0.0014685	0.0229944
ENSG00000205105	COX17P1	4.50712	1.70297	0.000100925	0.00354977
ENSG00000205133	TRIQK	457.552	0.87283	0.000363473	0.0089741
ENSG00000205534	RP11-345J4.8	35.1991	0.81387	0.00157252	0.0241884
ENSG00000205565	RP11-497H16.6	8.20719	-1.45942	0.000767119	0.015096
ENSG00000205609	EIF3CL	235.454	-3.83121	9.60132e-39	1.0611e-35
ENSG00000205707	LYRM5	244.305	0.849694	0.00427027	0.0462528
ENSG00000205746	RP11-1212A22.1	98.7951	-2.07687	1.68307e-10	2.52436e-08
ENSG00000205863	C1QTNF9B	3.91483	-2.10887	1.48631e-06	0.000111462
ENSG00000205903	ZNF316	330.037	-0.739397	0.000417186	0.00990245
ENSG00000205918	PDPK2	8.40923	-1.19997	0.00130451	0.0213003
ENSG00000206140	TMEM191C	14.3014	1.36327	0.000681214	0.0138472
ENSG00000206341	HLA-H	254.141	1.18791	0.00107535	0.019058
ENSG00000210107	MT-TQ	48.0583	-0.847193	0.000381417	0.00932954
ENSG00000210112	MT-TM	1.84587	-1.37078	0.00120491	0.0202568
ENSG00000210117	MT-TW	9.94252	-1.86085	6.42686e-06	0.000375909
ENSG00000210144	MT-TY	4.16317	-1.23141	0.00480965	0.0496769
ENSG00000211445	GPX3	9828.85	-0.911565	0.000435197	0.0101876
ENSG00000211598	IGKV4-1	108.122	1.35326	0.00200957	0.0284369
ENSG00000211625	IGKV3D-20	11.4778	1.50185	0.000601621	0.0126411
ENSG00000211648	IGLV1-47	21.5222	1.35133	0.00198395	0.0283202
ENSG00000211669	IGLV3-10	15.3934	1.50848	0.000537611	0.0116259
ENSG00000211679	IGLC3	295.152	1.25633	0.0039688	0.0440936
ENSG00000211935	IGHV1-3	17.1297	1.58595	0.000290926	0.00761604
ENSG00000211965	IGHV3-49	12.6843	1.50071	0.00061448	0.0128259
ENSG00000212789	ST13P5	5.79661	1.65207	0.000132398	0.00430381
ENSG00000212802	RPL15P3	23.7917	1.25899	2.37638e-05	0.00111134
ENSG00000212994	RPS26P6	5.4753	1.70829	7.37548e-05	0.00277532
ENSG00000213066	FGFR1OP	110.336	0.76097	0.00129188	0.0211598
ENSG00000213104	NPM1P46	4.2769	2.14106	1.01441e-06	8.03792e-05
ENSG00000213144	RP11-64B16.2	97.9447	-1.01951	0.000995413	0.0180654
ENSG00000213235	EEF1A1P16	22.8839	2.02435	1.31462e-10	2.01493e-08
ENSG00000213239	NPM1P32	3.33495	1.90843	1.31566e-05	0.00070475
ENSG00000213250	RBMS2P1	8.54491	-1.51759	2.62658e-05	0.00120685
ENSG00000213261	AC093106.7	11.6705	-1.08893	0.00108267	0.0190881
ENSG00000213300	HNRNPA3P6	12.9627	1.26894	0.0010715	0.019019
ENSG00000213326	RPS7P11	30.4368	-1.48588	1.37401e-06	0.000105297
ENSG00000213430	HSPD1P1	6.43835	1.31642	0.00177469	0.0261508
ENSG00000213553	RPLP0P6	283.951	3.18481	4.25137e-69	1.27529e-65
ENSG00000213563	C8orf82	300.771	-0.776912	5.95396e-05	0.00235445
ENSG00000213609	RP11-170M17.2	6.4357	2.17645	2.90665e-07	2.64216e-05
ENSG00000213638	ADAT3	10.3406	-1.26345	0.000422726	0.00996228
ENSG00000213639	PPP1CB	6564.38	0.944175	0.000573701	0.0122052
ENSG00000213757	CTC-451P13.1	9.19674	1.36263	0.000255869	0.00699576
ENSG00000213860	RPL21P75	16.1825	2.11141	8.86416e-10	1.24086e-07
ENSG00000213864	EEF1B2P2	2.3882	1.2249	0.00397487	0.0441377
ENSG00000213885	RPL13AP7	17.4619	1.30544	7.32698e-05	0.00276216
ENSG00000213939	RP11-314A20.1	7.26896	2.31408	2.30366e-08	2.60066e-06
ENSG00000213949	ITGA1	6732.74	0.871906	6.90352e-06	0.000400442
ENSG00000214016	RP6-105D16.1	1.79595	1.25951	0.00289862	0.035719
ENSG00000214078	CPNE1	1314.75	-0.60723	0.00224202	0.0304909
ENSG00000214110	LDHAP4	145.415	-1.34175	0.00119772	0.0201843
ENSG00000214182	PTMAP5	17.1501	1.43362	2.22544e-06	0.000153716
ENSG00000214199	EEF1A1P12	73.0984	3.01905	4.00501e-34	3.6564e-31
ENSG00000214212	C19orf38	51.6726	-1.21015	0.00275241	0.0345872
ENSG00000214309	MBLAC1	32.1785	-0.936023	0.00361656	0.0412273
ENSG00000214367	HAUS3	216.46	0.892897	0.000101741	0.00355905
ENSG00000214389	RPS3AP26	458.231	-3.05026	5.98646e-67	1.5713e-63
ENSG00000214425	LRRC37A4P	133.496	1.13549	3.52914e-08	3.85963e-06
ENSG00000214455	RCN1P2	66.5282	-3.85754	7.02642e-31	4.91803e-28
ENSG00000214456	PLIN5	38.8931	-1.33551	0.00223182	0.0304113
ENSG00000214562	NUTM2D	31.0067	0.899033	0.000941189	0.017431
ENSG00000214575	CPEB1	58.4145	0.883759	0.00142377	0.0225123
ENSG00000214761	HNRNPA1P15	4.17471	2.06094	2.42138e-06	0.000164339
ENSG00000214832	UPF3AP2	6.4616	1.2726	0.00146308	0.0229608
ENSG00000214940	NPIPA8	25.3716	-1.40003	0.00130749	0.0213188
ENSG00000214975	PPIAP29	12.7099	1.78317	6.68368e-07	5.52535e-05
ENSG00000215003	RPL15P20	5.68105	2.51849	8.48913e-09	1.0186e-06
ENSG00000215006	CHCHD2P2	6.69378	-1.64407	0.000107439	0.00369836
ENSG00000215030	RPL13P12	129.404	-1.22043	0.00206809	0.0289698
ENSG00000215237	RP11-54D18.2	9.03302	1.25289	0.00234434	0.0313587
ENSG00000215252	GOLGA8B	467.041	0.924808	0.00112663	0.0195189
ENSG00000215305	VPS16	390.105	-0.599177	7.58911e-05	0.00282546
ENSG00000215492	HNRNPA1P7	155.719	-1.87927	8.59307e-16	2.28402e-13
ENSG00000215749	GOLGA6L18	5.1631	1.49028	0.000610683	0.012772
ENSG00000215863	LINC01138	12.9327	1.28246	0.000127715	0.00419023
ENSG00000215895	RP11-334L9.1	4.3681	1.30328	0.00275113	0.0345872
ENSG00000216775	RP1-152L7.5	164.451	1.0423	0.000101866	0.00355905
ENSG00000217094	PPIAP31	108.425	4.42617	6.48622e-60	1.13498e-56
ENSG00000218175	AC016739.2	40.9818	2.05413	1.08467e-16	3.07783e-14
ENSG00000218283	MORF4L1P1	88.275	-3.7403	3.05626e-54	4.27836e-51
ENSG00000218350	LYPLA1P3	3.24843	1.86603	2.04145e-05	0.000980924
ENSG00000218426	RP11-475C16.1	163.831	-3.12474	5.20866e-21	2.14454e-18
ENSG00000218497	ZNF84	15.9042	-2.81662	1.56861e-14	3.71299e-12
ENSG00000218891	ZNF579	145.554	-0.79492	0.00135714	0.021837
ENSG00000219451	RPL23P8	15.0153	1.68314	1.45758e-06	0.00011006
ENSG00000219507	FTH1P8	30.4298	1.07443	0.000187839	0.00559468
ENSG00000219693	RP11-262H14.11	3.30641	1.312	0.00253793	0.0329773
ENSG00000219747	RP1-292B18.1	9.04534	1.49365	0.000136116	0.00438796
ENSG00000219928	RP11-40C6.2	12.4343	2.54362	4.9919e-10	7.17944e-08
ENSG00000220472	RP11-69L16.5	13.8725	2.41583	3.01622e-10	4.39824e-08
ENSG00000220842	RP11-572P18.1	159.038	-1.61007	1.98469e-14	4.6305e-12
ENSG00000221792	MIR1282	5.63672	-1.49605	0.000381849	0.00932954
ENSG00000221866	PLXNA4	1255.15	-0.918479	0.00171156	0.0255978
ENSG00000221886	C5orf54	167.963	0.873463	0.000293238	0.00763946
ENSG00000223361	FTH1P10	10.1794	1.65428	5.42592e-05	0.00219103
ENSG00000223482	NUTM2A-AS1	243.074	1.04143	1.58865e-05	0.000803821
ENSG00000223551	TMSB4XP4	157.926	5.48332	3.01e-112	1.5801e-108
ENSG00000223561	AC003090.1	30.5019	1.3204	0.00025332	0.00695323
ENSG00000223612	RP11-289I10.2	3.46673	-1.54272	0.000417357	0.00990245
ENSG00000223705	NSUN5P1	316.06	0.643501	0.00477353	0.0494986
ENSG00000223722	RP11-467L13.5	8.01763	-1.21342	0.00482047	0.0497153
ENSG00000223768	LINC00205	90.852	0.831647	8.45449e-07	6.80181e-05
ENSG00000223839	FAM95B1	6.14208	1.78171	4.59e-05	0.0018945
ENSG00000224163	RP11-309L24.6	14.0428	-2.49449	4.9759e-11	7.91545e-09
ENSG00000224238	WARS2-IT1	5.83492	1.41937	0.000441025	0.0102896
ENSG00000224321	RP11-169K16.6	7.42959	2.07428	4.22629e-07	3.65145e-05
ENSG00000224546	EIF4BP3	22.9298	4.14748	3.04516e-28	1.82692e-25
ENSG00000224578	HNRNPA1P48	27.3511	1.53014	1.08731e-06	8.51918e-05
ENSG00000224687	RASAL2-AS1	24.673	1.13131	0.000301911	0.00779768
ENSG00000224831	RP11-651P23.4	19.2818	-1.84816	4.38366e-07	3.75707e-05
ENSG00000224861	YBX1P1	69.811	-1.81203	2.32052e-12	4.27424e-10
ENSG00000224882	IKBKGP1	13.1103	-3.24223	2.87588e-15	6.94112e-13
ENSG00000224897	POT1-AS1	42.7714	1.01037	0.00129889	0.0212414
ENSG00000224914	LINC00863	79.0351	1.08348	0.000125677	0.00414933
ENSG00000224940	PRRT4	18.6849	-1.0946	0.00136965	0.0220045
ENSG00000225031	EIF4BP7	88.5014	-1.8743	5.04343e-12	8.97473e-10
ENSG00000225135	RP11-361F15.2	35.423	1.1686	0.00123393	0.0205799
ENSG00000225151	GOLGA2P7	21.623	2.44707	2.25972e-12	4.19909e-10
ENSG00000225200	AB019441.29	26.6891	2.21879	4.33854e-16	1.21468e-13
ENSG00000225285	RP4-758J18.10	10.6754	-1.32979	0.00040197	0.00966847
ENSG00000225373	WASH5P	183.823	4.10463	1.47394e-62	3.43887e-59
ENSG00000225383	SFTA1P	17.5881	1.43426	0.000455627	0.0104927
ENSG00000225630	MTND2P28	8122.22	1.02833	0.000426532	0.0100212
ENSG00000225762	RP11-511I2.2	2.26065	-1.18692	0.0035071	0.0405518
ENSG00000225784	RP11-592B15.4	10.3709	-1.52329	0.000227435	0.00642757
ENSG00000225830	ERCC6	464.06	0.651196	0.000133428	0.00432363
ENSG00000225972	MTND1P23	23.1405	2.04576	3.61308e-12	6.5403e-10
ENSG00000226067	LINC00869	21.9027	1.30674	3.03708e-05	0.00135686
ENSG00000226121	AHCTF1P1	10.1734	-1.9337	4.86369e-06	0.000296883
ENSG00000226243	RPL37AP1	27.523	-3.93966	1.14233e-22	5.33039e-20
ENSG00000226360	RPL10AP6	41.7724	3.18754	3.33021e-28	1.94244e-25
ENSG00000226396	RPS14P3	14.5632	1.79363	3.13717e-05	0.00138101
ENSG00000226409	RP11-735G4.1	39.8227	0.926449	0.00153937	0.023785
ENSG00000226415	TPI1P1	4.99165	1.34962	0.00101178	0.0182208
ENSG00000226637	RP6-206I17.3	2.75819	1.23122	0.00368339	0.0416406
ENSG00000226981	ABHD17AP6	19.9487	2.95452	6.73766e-16	1.81381e-13
ENSG00000226982	CENPCP1	3.88335	-1.8212	3.10183e-05	0.00137532
ENSG00000227008	RP3-417G15.1	3.87449	1.43598	0.000857453	0.0162352
ENSG00000227063	RPL41P1	38.1037	2.06071	7.10601e-13	1.3945e-10
ENSG00000227081	RP11-543P15.1	160.507	-2.77493	1.63865e-31	1.3234e-28
ENSG00000227097	RP11-742N3.1	192.257	-1.69747	6.40379e-05	0.00248552
ENSG00000227124	ZNF717	74.2346	0.87381	0.00232421	0.0312444
ENSG00000227184	EPPK1	144.202	-1.75323	1.79451e-05	0.000882461
ENSG00000227191	TRGC2	12.0875	1.22127	0.00244223	0.0321718
ENSG00000227232	WASH7P	123.791	-0.812912	0.00426216	0.0462038
ENSG00000227525	RPL7P6	9.80533	2.3871	8.11971e-09	9.79872e-07
ENSG00000227543	SPAG5-AS1	3.06721	-1.34713	0.00210497	0.0291991
ENSG00000227544	AC018647.3	15.2251	1.25152	0.00177806	0.0261821
ENSG00000227615	RP11-864N7.2	21.7821	-1.28748	3.59717e-05	0.00154781
ENSG00000227627	RP1-101K10.6	9.95001	1.23827	0.000940723	0.017431
ENSG00000227694	AC005884.1	13.9132	2.38199	1.39563e-10	2.12358e-08
ENSG00000227781	GLUD1P2	12.2325	1.87686	2.4966e-06	0.000168517
ENSG00000227914	RP11-130C19.3	3.06778	1.26479	0.00365323	0.0414681
ENSG00000227921	AL353791.1	15.2809	1.40017	0.000336563	0.00842331
ENSG00000227939	RPL3P2	31.4267	2.63582	1.43198e-15	3.5375e-13
ENSG00000228168	HNRNPA1P21	4.0468	1.51916	0.000470609	0.0106946
ENSG00000228169	PPIAP19	10.194	1.20983	0.00127904	0.0210258
ENSG00000228217	AL390877.1	20.6158	2.10494	1.44841e-12	2.73998e-10
ENSG00000228224	NACAP1	10.3233	3.21664	2.87318e-14	6.48721e-12
ENSG00000228253	MT-ATP8	11148.8	-0.678525	2.76463e-05	0.00125653
ENSG00000228305	AC016734.2	19.8091	-2.91352	5.62808e-17	1.61888e-14
ENSG00000228434	AC004951.6	13.6187	1.01506	0.00258143	0.0333364
ENSG00000228463	AP006222.2	26.0757	1.29262	7.11899e-05	0.00271297
ENSG00000228477	RP3-342P20.2	4.33904	1.37521	0.00103059	0.0184644
ENSG00000228589	SPCS2P4	24.0114	-1.89502	9.61186e-12	1.65434e-09
ENSG00000228696	ARL17B	39.5204	1.21679	0.00264632	0.0339447
ENSG00000228818	RP11-567G24.1	1.87517	-1.26923	0.00325122	0.0386794
ENSG00000229124	VIM-AS1	117.044	-0.80473	0.000271759	0.0072693
ENSG00000229256	ST13P13	2.1413	1.21272	0.00452544	0.0478716
ENSG00000229344	RP5-857K21.7	35.47	1.44062	4.4659e-07	3.81199e-05
ENSG00000229605	RP11-492M23.2	10.1519	2.47359	2.30627e-11	3.7782e-09
ENSG00000229638	RPL4P4	11.159	1.21084	0.000395241	0.00956137
ENSG00000229644	NAMPTL	59.2947	-4.0753	9.51081e-23	4.53882e-20
ENSG00000229801	RP11-353N4.1	19.3077	3.04889	1.17115e-13	2.48402e-11
ENSG00000229847	EMX2OS	10.137	-1.27872	0.00154366	0.0238336
ENSG00000229874	RP11-312O7.2	5.70144	-2.23529	1.25589e-07	1.23808e-05
ENSG00000229891	Z83851.1	22.5028	-1.04162	0.00112582	0.0195189
ENSG00000229994	RPL5P4	4.22715	1.24535	0.0032433	0.0386508
ENSG00000230043	TMSB4XP6	98.5007	-1.18498	7.72993e-10	1.08935e-07
ENSG00000230076	AC016708.2	20.3854	2.46293	1.34172e-11	2.27205e-09
ENSG00000230183	CNOT6LP1	23.8642	-1.0266	0.00202898	0.0286321
ENSG00000230593	AC090804.1	9.31834	3.17097	5.87609e-14	1.31262e-11
ENSG00000230606	AC159540.1	185.428	2.14745	3.3215e-13	6.77134e-11
ENSG00000230630	DNM3OS	99.5064	0.77976	0.00252017	0.0328546
ENSG00000230633	RP11-37E23.5	61.4171	1.07396	0.000797116	0.0154539
ENSG00000230721	RP4-612B15.2	6.84473	2.34248	6.53174e-08	6.78977e-06
ENSG00000230797	YY2	30.9722	1.01189	0.00211297	0.0292425
ENSG00000230837	RPL31P2	3.94845	1.96612	6.41778e-06	0.000375909
ENSG00000230838	AC093850.2	23.6046	1.55646	7.09037e-05	0.00270697
ENSG00000230869	CTGLF10P	19.0839	2.19625	6.06098e-10	8.59922e-08
ENSG00000230880	RP11-417J8.3	6.97104	-1.33598	0.00224061	0.0304909
ENSG00000230897	RPS18P12	46.626	3.51036	1.34819e-28	8.32629e-26
ENSG00000230979	AC079250.1	41.5793	-2.03623	6.28646e-12	1.10003e-09
ENSG00000231006	RPL7P32	5.42121	1.41317	0.000981896	0.0179442
ENSG00000231043	AC007238.1	8.87792	-1.91677	2.05244e-06	0.000145599
ENSG00000231156	AC093702.1	4.3716	-2.02097	3.92482e-06	0.000249737
ENSG00000231234	SKP1P1	6.27373	1.29155	0.00191934	0.0276992
ENSG00000231360	AL592284.1	28.3629	1.57385	1.86932e-06	0.000135352
ENSG00000231369	RP1-40G4P.1	15.1559	2.44054	1.62389e-11	2.72788e-09
ENSG00000231409	RP11-83J16.1	3.6016	1.83194	2.79417e-05	0.00126722
ENSG00000231437	RP11-88H9.2	12.4082	-1.16205	0.00198565	0.0283252
ENSG00000231536	AC123886.2	9.34659	2.21231	1.1312e-07	1.12573e-05
ENSG00000231747	AC079922.2	6.8648	2.44754	4.88208e-09	6.06591e-07
ENSG00000231767	MIR4426	9.04063	2.36909	1.89967e-08	2.16789e-06
ENSG00000231817	RP11-189B4.6	8.26322	-1.65761	8.99075e-05	0.00322714
ENSG00000232060	RP11-255N24.4	4.65755	-2.4517	1.79701e-08	2.07328e-06
ENSG00000232229	LINC00865	100.904	1.77503	2.40377e-07	2.24331e-05
ENSG00000232300	FAM215B	2.67035	1.73649	6.97979e-05	0.00267937
ENSG00000232341	RPL4P2	2.56078	1.27496	0.00333751	0.0393083
ENSG00000232434	C9orf172	48.894	-0.830629	0.000967583	0.017791
ENSG00000232460	BMPR1APS2	13.234	-2.31445	5.12215e-11	8.02648e-09
ENSG00000232472	EEF1B2P3	32.8293	-1.73912	3.0918e-11	4.99398e-09
ENSG00000232527	RP11-14N7.2	64.7292	-0.910598	0.000306822	0.00786649
ENSG00000232561	GTF2IP1	200.038	-0.918559	3.30882e-07	2.95654e-05
ENSG00000232573	RPL3P4	43.2355	1.10898	9.11619e-06	0.000510458
ENSG00000232628	RP11-365O16.3	4.73156	1.39878	0.00140948	0.0224554
ENSG00000233098	RP11-344E13.3	168.047	1.59689	1.62545e-05	0.000816535
ENSG00000233178	RP11-88I18.2	5.88525	2.27286	7.7157e-08	7.86477e-06
ENSG00000233254	RPL21P134	4.00976	1.3559	0.00195137	0.0280075
ENSG00000233396	RP11-458D21.1	20.4107	1.34242	2.07966e-06	0.000147033
ENSG00000233426	EIF3FP3	59.6159	-2.52905	1.70598e-09	2.32612e-07
ENSG00000233476	EEF1A1P6	163.659	1.07035	4.3483e-11	6.96989e-09
ENSG00000233608	TWIST2	45.8841	-1.09432	9.20725e-05	0.00328799
ENSG00000233631	RP11-457M11.2	23.3621	3.32127	8.36176e-23	4.08326e-20
ENSG00000233812	AC139426.2	3.23433	1.25209	0.00380922	0.0426365
ENSG00000233830	EIF4HP1	21.923	-2.22677	9.60823e-13	1.85095e-10
ENSG00000233927	RPS28	1390.16	-1.7939	5.43956e-06	0.000328218
ENSG00000233954	RP11-169K16.7	24.2749	-1.22891	7.35335e-06	0.000423029
ENSG00000234287	RP11-761N21.2	4.68162	1.21486	0.00354932	0.04086
ENSG00000234335	RPS4XP11	6.8276	2.42557	1.84271e-08	2.11438e-06
ENSG00000234389	AC007278.3	10.633	-1.32676	0.00172942	0.0257549
ENSG00000234545	FAM133B	284.959	0.961803	2.41576e-08	2.68392e-06
ENSG00000234585	CCT6P3	89.6895	1.2912	4.71468e-08	5.10303e-06
ENSG00000234589	RP11-253E3.1	44.7866	3.22624	5.37614e-29	3.64155e-26
ENSG00000234648	AL162151.3	21.4292	-2.15949	5.38871e-08	5.71926e-06
ENSG00000234769	WASH4P	75.3846	1.40947	7.40433e-11	1.14321e-08
ENSG00000234785	EEF1GP5	5.20752	2.36268	4.86887e-08	5.2429e-06
ENSG00000234797	RPS3AP6	22.5864	1.54034	1.93881e-06	0.000138342
ENSG00000234814	SVILP1	62.2861	-2.82335	6.6817e-14	1.47687e-11
ENSG00000234851	RP11-3P17.3	215.682	-1.56133	2.43153e-10	3.59558e-08
ENSG00000234882	EIF3EP1	41.7232	0.753592	0.00451742	0.0478109
ENSG00000234961	RP11-124N14.3	25.3003	-1.97689	1.08511e-06	8.51918e-05
ENSG00000234964	FABP5P7	11.6347	-2.75546	9.19323e-12	1.59537e-09
ENSG00000234972	TBC1D3C	2.02266	1.30196	0.00166282	0.0251556
ENSG00000235043	TECRP1	11.9632	-2.45586	2.7324e-10	4.01223e-08
ENSG00000235162	C12orf75	2766.62	0.904209	0.000282708	0.00746706
ENSG00000235257	AC093415.2	113.614	0.631662	0.00117954	0.0200065
ENSG00000235272	FAM103A2P	4.90946	-1.85369	1.44771e-05	0.000752452
ENSG00000235373	RP11-206L10.3	17.495	1.17921	0.000116931	0.00395381
ENSG00000235552	RPL6P27	200.162	4.60771	1.1068e-52	1.45253e-49
ENSG00000235636	NUS1P1	6.12821	-1.83183	1.46339e-05	0.000758722
ENSG00000235655	H3F3AP4	289.082	1.02014	1.59243e-06	0.000118155
ENSG00000235750	KIAA0040	1466.94	-1.13013	2.42619e-06	0.000164339
ENSG00000235912	RP1-159A19.3	4.26126	1.57687	0.000274429	0.0073071
ENSG00000235946	LL0XNC01-240C2.1	4.983	1.41247	0.000579759	0.0122843
ENSG00000235957	COX7CP1	3.85881	1.40261	0.00131644	0.0213978
ENSG00000235961	PNMA6C	5.22954	-2.2922	1.66725e-07	1.59858e-05
ENSG00000236060	HSPB1P1	48.436	-1.18992	0.000561059	0.0119849
ENSG00000236233	RP11-12A20.7	8.9723	2.30136	1.56522e-08	1.82592e-06
ENSG00000236263	RP11-263K19.6	6.31966	1.38973	0.000749707	0.0148233
ENSG00000236287	ZBED5	822.225	0.618476	0.00232005	0.031228
ENSG00000236439	RP11-175B9.3	48.0248	-0.834526	0.00393852	0.0437803
ENSG00000236452	AC123023.1	3.6856	1.57503	0.000291116	0.00761604
ENSG00000236480	PKMP1	2.02866	1.34026	0.00128498	0.0210632
ENSG00000236575	ZNF26	7.19839	-1.94574	1.09368e-06	8.53228e-05
ENSG00000236876	TMSB4XP1	38.886	3.29969	3.33075e-21	1.42733e-18
ENSG00000237264	FTH1P11	7.0382	1.19846	0.0017411	0.0258737
ENSG00000237506	RPSAP15	66.4229	-1.81123	3.72133e-10	5.389e-08
ENSG00000237682	RP3-514P16.1	4.38343	-1.99782	4.21007e-06	0.00026389
ENSG00000237683	AL627309.1	77.3723	-1.23923	0.00329348	0.0389565
ENSG00000237748	UQCRBP1	5.15289	2.11165	9.51159e-07	7.56532e-05
ENSG00000237758	BANF1P3	14.1356	-1.35486	0.000403758	0.00970036
ENSG00000237973	hsa-mir-6723	2142.23	3.37719	7.4261e-122	5.1978e-118
ENSG00000238009	RP11-34P13.7	4.62419	1.3599	0.001728	0.0257549
ENSG00000238465	snoU13	4.62503	1.33066	0.00221802	0.0302834
ENSG00000239470	RP11-16F15.2	19.2015	3.30495	1.19441e-17	3.80004e-15
ENSG00000240087	RP11-254B13.1	51.4737	-0.895819	0.000906054	0.0169566
ENSG00000240184	PCDHGC3	1174.83	-0.615789	6.24725e-07	5.20554e-05
ENSG00000240231	RPS27P29	3.39952	1.25997	0.00367965	0.04163
ENSG00000240288	GHRLOS	11.9903	1.18316	0.00163977	0.0249326
ENSG00000240342	RPS2P5	680.504	-4.23645	2.03395e-36	2.13544e-33
ENSG00000240356	RPL23AP7	424.51	0.726417	0.000259918	0.007088
ENSG00000240854	RP11-64K7.1	3.65628	-2.19755	5.14955e-07	4.32521e-05
ENSG00000240859	AC093627.10	40.7628	0.663563	0.00455448	0.0480336
ENSG00000240914	RPL15P2	32.1465	2.05654	1.26959e-13	2.66588e-11
ENSG00000240935	PLGLA	4.46064	1.39043	0.00111533	0.0193872
ENSG00000241061	RPL5P1	5.41564	1.23965	0.00421812	0.045845
ENSG00000241168	RP11-10O22.1	5.53661	1.53819	0.000285819	0.00753026
ENSG00000241352	RP11-392P7.1	2.79762	1.50456	0.000583445	0.0123419
ENSG00000241399	CD302	2745.42	0.950036	0.00011247	0.00384007
ENSG00000241644	INMT	2049.37	0.799686	0.0027042	0.0344242
ENSG00000241717	VWFP1	3.55261	-1.46152	0.000786675	0.0153092
ENSG00000241732	RP11-38P22.2	36.0158	1.05187	0.000656674	0.0134788
ENSG00000241839	PLEKHO2	1188.05	-0.813179	0.00067265	0.0137263
ENSG00000242060	RPS3AP49	2.23186	1.3407	0.00162235	0.0247574
ENSG00000242071	RPL7AP6	131.154	-1.8871	2.49865e-13	5.14379e-11
ENSG00000242083	RPL7AP31	11.6193	3.26586	1.35891e-15	3.43788e-13
ENSG00000242086	LINC00969	279.628	0.620908	0.000983241	0.0179531
ENSG00000242299	RP11-234A1.1	58.0998	-1.14619	9.71786e-05	0.00343142
ENSG00000242445	RPL7AP11	5.72768	2.33122	2.33843e-08	2.62162e-06
ENSG00000242516	LINC00960	36.4818	1.64203	0.000174485	0.00527931
ENSG00000242814	RP11-436H11.1	2.74722	1.47217	0.000710079	0.0142818
ENSG00000242951	RP11-507E23.1	9.81106	3.33879	1.21678e-15	3.14181e-13
ENSG00000243071	RP11-613M5.2	10.8974	2.37033	1.97587e-10	2.94251e-08
ENSG00000243167	RPS10P28	4.73877	1.27806	0.00281098	0.0350089
ENSG00000243414	TICAM2	4.10836	-1.63523	0.000157317	0.00489384
ENSG00000243422	RP11-413E6.1	4.40897	1.46913	0.000779728	0.0152081
ENSG00000243517	RP11-627K11.1	5.85345	1.27106	0.00237657	0.0316404
ENSG00000243667	WDR92	82.5573	0.595945	0.00282252	0.0351109
ENSG00000243701	LINC00883	216.533	0.655075	0.000195945	0.00577061
ENSG00000243716	NPIPB5	452.471	2.02378	2.96814e-25	1.52012e-22
ENSG00000243802	RP11-390K5.1	9.43822	2.47339	5.26545e-09	6.50376e-07
ENSG00000243829	CTB-33G10.1	20.9428	3.12109	5.16736e-20	2.00934e-17
ENSG00000243943	ZNF512	500.605	0.652511	7.87944e-05	0.00291289
ENSG00000243964	RP11-16F15.1	8.7441	2.34511	4.99852e-08	5.35504e-06
ENSG00000244086	RPS20P35	3.97837	1.36583	0.00150248	0.0233523
ENSG00000244363	RPL7P23	13.1295	1.60369	3.1687e-06	0.000208578
ENSG00000244380	RP11-24C3.2	3.95825	-1.66383	0.0001046	0.00361885
ENSG00000244398	RP11-466H18.1	214.184	-2.39168	1.09729e-27	6.06339e-25
ENSG00000244482	LILRA6	91.3883	-1.45395	0.000214484	0.00614426
ENSG00000244582	RPL21P120	7.01304	2.49279	9.08855e-10	1.26385e-07
ENSG00000244607	CCDC13	12.0137	-0.974556	0.00310562	0.037673
ENSG00000244716	RP11-20O24.4	33.8676	1.42586	6.10899e-09	7.41484e-07
ENSG00000245067	IGFBP7-AS1	131.357	-0.86663	0.00141474	0.0224717
ENSG00000245205	EEF1A1P4	32.0993	2.59803	1.40506e-18	4.91723e-16
ENSG00000245694	CRNDE	239.521	0.738405	0.000311429	0.0079458
ENSG00000247556	OIP5-AS1	2205.75	0.60908	0.0021034	0.0291991
ENSG00000247627	MTND4P12	764.734	1.51509	0.000469264	0.0106766
ENSG00000248121	SMURF2P1	3.26103	-1.23464	0.00449678	0.0476645
ENSG00000248333	CDK11B	393.726	-0.806718	4.8108e-05	0.00196915
ENSG00000249264	EEF1A1P9	18.0558	1.01959	0.00170939	0.0255836
ENSG00000249464	LINC01091	29.4204	0.937811	0.00380268	0.042606
ENSG00000249855	EEF1A1P19	53.4178	3.15113	5.81766e-31	4.36283e-28
ENSG00000249936	RAC1P2	38.9357	-2.2791	1.22692e-15	3.14181e-13
ENSG00000250144	RP11-553P9.1	12.1409	2.3972	5.14434e-10	7.34836e-08
ENSG00000250182	EEF1A1P13	68.8494	0.942594	4.82516e-05	0.00197118
ENSG00000250303	RP11-356J5.12	485.548	0.6522	0.00469593	0.0490085
ENSG00000250321	RP11-478C6.4	29.7709	-1.61315	4.24305e-07	3.65145e-05
ENSG00000250412	KLHL2P1	5.33085	1.23919	0.00433414	0.0466393
ENSG00000250462	LRRC37BP1	176.32	0.724037	1.30989e-07	1.28017e-05
ENSG00000250588	IQCJ-SCHIP1	180.194	-0.993541	0.00207668	0.0290128
ENSG00000250731	TPM3P6	5.02972	-2.34798	8.00948e-08	8.12479e-06
ENSG00000250950	RP11-33B1.3	4.14871	1.4368	0.000822984	0.0157817
ENSG00000251079	BMS1P2	6.47403	1.93595	5.40775e-06	0.000327239
ENSG00000251143	RP11-849H4.4	21.1096	-1.08911	0.000874025	0.0165191
ENSG00000251180	CU459201.1	3.18385	-1.97959	6.18059e-06	0.000367649
ENSG00000251259	AC004069.2	11.5737	1.58558	7.2576e-06	0.000418668
ENSG00000251495	PPIAP11	71.8765	5.11296	3.89399e-62	8.1766e-59
ENSG00000253203	GUSBP3	37.1145	1.385	3.10459e-05	0.00137532
ENSG00000253476	RP11-395I14.2	12.2879	1.06109	0.00147095	0.0230157
ENSG00000253525	CTD-2114J12.1	16.6598	-1.79069	3.73578e-05	0.00159439
ENSG00000253552	HOXA-AS2	92.1795	-1.0231	0.00315006	0.0379599
ENSG00000253816	RP11-1415C14.3	8.10753	1.31439	0.0013263	0.0214876
ENSG00000253846	PCDHGA10	44.6453	-0.75522	0.000745132	0.0147947
ENSG00000253882	RP11-61L23.2	69.7656	2.09094	3.25687e-21	1.42475e-18
ENSG00000253945	RP11-328L11.1	2.28281	1.64438	0.000130774	0.00426587
ENSG00000253958	CLDN23	6.18801	-1.53218	0.00041441	0.00988466
ENSG00000254363	CTB-131B5.5	23.138	-1.12256	0.00290627	0.0357923
ENSG00000254373	RP11-34P1.2	3.08839	1.27976	0.00331218	0.0391024
ENSG00000254402	LRRC24	33.2999	-0.835802	0.00316127	0.0380189
ENSG00000254470	AP5B1	137.804	-0.852046	0.000689939	0.0139839
ENSG00000254539	RP4-791M13.3	34.6981	1.52903	1.56323e-06	0.0001164
ENSG00000254612	RP11-676M6.1	30.7802	-1.2562	8.03918e-07	6.51764e-05
ENSG00000254685	FPGT	193.963	0.807303	0.000478888	0.0108126
ENSG00000254837	AP001372.2	81.9596	1.08583	3.12781e-06	0.000206534
ENSG00000254852	NPIPA2	9.55355	1.88471	1.51371e-05	0.000777137
ENSG00000254893	RP11-466P24.2	43.208	-2.04655	1.12632e-13	2.41332e-11
ENSG00000255302	EID1	2050	1.18685	0.00114799	0.0197749
ENSG00000255322	RP11-22P4.1	3.10648	1.21913	0.00484796	0.0499252
ENSG00000255366	RP11-1134I14.8	43.0287	1.00855	0.000177344	0.00532741
ENSG00000255418	RP11-266A24.1	9.9914	1.39928	0.00140516	0.0224206
ENSG00000255529	POLR2M	898.101	0.936907	7.66389e-05	0.00284322
ENSG00000256043	CTSO	1652.22	0.610794	0.000246898	0.00679666
ENSG00000256185	RP11-612B6.2	14.3068	1.05882	0.00242364	0.0320073
ENSG00000256223	ZNF10	237.49	0.603994	0.00312269	0.0377927
ENSG00000256238	RP11-473N11.2	2.17922	-1.47827	0.000709876	0.0142818
ENSG00000256338	RPL41P2	14.7921	1.37449	3.68592e-06	0.000239619
ENSG00000256393	AC138123.2	25.8188	1.16707	9.46069e-06	0.000526938
ENSG00000256537	RP11-785H5.1	62.2818	-1.42267	2.34719e-08	2.62162e-06
ENSG00000256618	MTRNR2L1	6.73184	-1.62155	0.000126398	0.00416003
ENSG00000256671	LIMS3L	14.1455	-1.35679	0.00115592	0.0198395
ENSG00000256771	ZNF253	106.304	0.594901	0.00113141	0.0195325
ENSG00000256977	LIMS3	3.89261	-1.69266	0.000102138	0.00356262
ENSG00000257773	ST13P3	2.66385	1.52614	0.000494933	0.0110325
ENSG00000258289	CHURC1	2406.56	0.745775	0.00029784	0.0077306
ENSG00000258486	RN7SL1	126.505	-1.65863	6.33286e-05	0.00246254
ENSG00000258488	RP11-467L19.8	5.32095	2.02281	3.82709e-06	0.000245753
ENSG00000258684	BMS1P16	10.2685	3.12788	8.92108e-14	1.93118e-11
ENSG00000258982	RP11-638I2.4	4.81918	-1.47431	0.000741916	0.0147666
ENSG00000259004	RP11-8L8.2	2.76742	-1.34314	0.00204859	0.0288313
ENSG00000259295	CSPG4P12	68.665	3.47652	1.60602e-26	8.43078e-24
ENSG00000259328	RP11-152F13.7	2.51649	1.54207	0.000364127	0.0089741
ENSG00000259426	RP11-253M7.1	75.5316	0.954557	0.000806941	0.0155775
ENSG00000259479	CTD-2008A1.2	7.27356	-2.18076	3.30746e-07	2.95654e-05
ENSG00000259623	RP11-156E6.1	155.14	1.06189	3.48378e-05	0.00150519
ENSG00000259716	RP5-977B1.11	63.58	-1.94714	3.57737e-09	4.58035e-07
ENSG00000259781	RP11-673C5.1	93.2239	-4.06589	3.21553e-50	3.97174e-47
ENSG00000259865	RP11-488L18.10	44.4437	1.35528	0.00011852	0.00398191
ENSG00000259976	RP11-553L6.5	374.353	0.602834	0.00353015	0.040751
ENSG00000260231	JHDM1D-AS1	83.5074	-1.30438	0.000102876	0.00358242
ENSG00000260244	RP11-588K22.2	967.588	1.08468	5.70815e-05	0.00228023
ENSG00000260396	AC012065.7	553.137	0.604657	0.0013023	0.0212807
ENSG00000260409	RP11-403B2.7	7.68178	-1.5777	0.000206194	0.0059817
ENSG00000260628	RP11-1166P10.1	4.40349	-2.03924	2.51771e-06	0.000168904
ENSG00000260693	AC026150.8	31.8761	1.69048	4.08655e-07	3.57539e-05
ENSG00000260766	RP11-226L15.5	70.2187	0.836118	0.00117078	0.0199531
ENSG00000260781	ARHGAP23P1	15.7	-2.10246	1.46187e-07	1.41458e-05
ENSG00000260923	AC137934.1	19.0298	1.3035	0.000119987	0.00401833
ENSG00000261052	SULT1A3	4.06445	1.44053	0.00100932	0.0181985
ENSG00000261140	RP11-20I23.6	4.89189	1.86968	9.02382e-06	0.000506637
ENSG00000261221	ZNF865	294.195	-0.754573	3.1267e-05	0.0013793
ENSG00000261326	RP5-1057J7.6	56.4872	0.834164	0.00264482	0.0339447
ENSG00000261612	SUB1P3	2.66414	1.88716	1.48114e-05	0.000764151
ENSG00000261613	RP11-20I23.13	56.185	2.56723	2.19787e-17	6.7869e-15
ENSG00000261625	RP11-554A11.4	139.84	-1.26906	6.73132e-06	0.000391535
ENSG00000261706	AP001505.9	10.6047	-1.21404	0.000532555	0.0115369
ENSG00000261739	GOLGA8S	13.8809	3.42478	9.55367e-18	3.1345e-15
ENSG00000261824	LINC00662	163.623	0.649635	4.59841e-06	0.000281508
ENSG00000262049	RP13-1032I1.7	55.3941	-0.700902	0.00439635	0.0470512
ENSG00000262292	RP11-160E2.11	3.79093	1.74241	5.3811e-05	0.00217712
ENSG00000262814	MRPL12	36.9664	-1.297	4.03501e-07	3.54507e-05
ENSG00000263053	RP11-1055B8.6	15.3265	-1.18733	0.00141209	0.022463
ENSG00000263065	AF001548.6	36.189	-1.03689	0.00121558	0.0204199
ENSG00000263327	TAPT1-AS1	35.5966	0.627986	0.00358756	0.0410728
ENSG00000263335	AF001548.5	80.4725	-1.23103	1.89334e-06	0.00013662
ENSG00000263535	AK4P1	6.00814	-1.349	0.00198847	0.0283439
ENSG00000263846	CIAPIN1P	2.20622	-1.37471	0.00109881	0.0192274
ENSG00000264207	RP11-196G18.23	33.5302	2.34808	2.95367e-09	3.80498e-07
ENSG00000264281	CTD-2031P19.4	21.222	2.56824	7.65425e-14	1.67421e-11
ENSG00000264433	RP11-720L2.3	22.917	1.32424	1.3508e-05	0.0007199
ENSG00000264462	MIR3648	2.3293	-1.4023	0.000898367	0.0168729
ENSG00000264577	AC010761.8	6.00286	-1.78452	3.99901e-05	0.00168617
ENSG00000265150	RN7SL2	357.359	-1.31676	0.00115647	0.0198395
ENSG00000265401	RP11-138I1.4	10.0727	-1.40575	0.000469308	0.0106766
ENSG00000266402	SNORA76	7.77103	-1.33707	0.000807142	0.0155775
ENSG00000266918	RP11-798G7.8	4.20738	1.64228	0.00015882	0.00493327
ENSG00000267152	CTD-2528L19.6	27.1186	0.819857	0.00311507	0.0377657
ENSG00000267198	RP11-798G7.6	12.3845	1.19183	0.00105599	0.0187754
ENSG00000267199	RP11-861E21.2	36.0004	1.02719	0.00329162	0.0389565
ENSG00000267405	CTC-296K1.4	112.288	0.695305	0.00391266	0.0435621
ENSG00000267534	S1PR2	34.1057	-1.133	8.54146e-06	0.000482133
ENSG00000267598	CTC-250I14.6	4.35246	-1.20997	0.00417671	0.0456072
ENSG00000267696	CTB-151G24.1	2.19544	1.27258	0.00347905	0.0403786
ENSG00000267809	NDUFV2P1	16.4731	-2.18975	1.41795e-10	2.14202e-08
ENSG00000268397	AC008443.1	29.887	1.00919	0.000513984	0.0112975
ENSG00000268568	AC007228.9	17.9035	-2.43432	5.07696e-11	8.01548e-09
ENSG00000268858	C20ORF135	9.81629	-1.14591	0.00335391	0.0393984
ENSG00000268942	CKS1B	4.09059	-1.42267	0.00107915	0.019058
ENSG00000269028	MTRNR2L12	108.08	4.19339	1.20074e-59	1.93947e-56
ENSG00000269318	AC007292.3	3.73916	-1.42902	0.000912978	0.0170255
ENSG00000269337	AL591479.1	38.1488	1.00546	3.4397e-05	0.00149229
ENSG00000269374	CTB-50E14.5	33.0343	-4.13275	1.06819e-27	6.06214e-25
ENSG00000269614	RP11-277L2.5	14.4077	2.2668	2.14188e-07	2.01683e-05
ENSG00000269728	RP11-145M9.4	1042.97	0.831063	0.000144368	0.00457922
ENSG00000269911	FAM226B	2.25014	1.46504	0.00078821	0.0153185
ENSG00000269930	RP11-932O9.9	50.9348	3.22682	3.38849e-17	1.00213e-14
ENSG00000269937	RP11-20I23.8	38.6896	2.71878	1.28924e-18	4.58839e-16
ENSG00000269968	RP5-940J5.9	28.9742	-1.79233	3.01029e-07	2.71288e-05
ENSG00000269983	RP11-497H16.9	34.5367	3.80602	4.25535e-21	1.78708e-18
ENSG00000269996	RP11-343N15.5	323.455	0.979011	1.24543e-05	0.000670553
ENSG00000270055	CTD-3092A11.2	146.694	1.13347	2.68956e-08	2.97239e-06
ENSG00000270074	LINC00965	22.4192	3.70885	8.59952e-21	3.47255e-18
ENSG00000270173	RP11-382B18.4	7.46426	1.58284	0.000170593	0.00522173
ENSG00000270189	RP11-258C19.7	112.177	0.771296	0.000274564	0.0073071
ENSG00000271147	RP4-769N13.6	74.5538	0.673259	0.000516751	0.0113264
ENSG00000271259	RP11-1109F11.5	7.57234	1.41485	0.000837395	0.0159416
ENSG00000271324	RP11-10C24.2	8.16378	1.52359	0.000228356	0.00643747
ENSG00000271533	RP3-368A4.6	100.898	1.2525	4.87871e-05	0.00198919
ENSG00000271755	RP1-153G14.4	16.139	-0.98778	0.00164846	0.0249923
ENSG00000272005	RP11-91J19.4	160.757	0.732059	0.00352017	0.0406805
ENSG00000272040	CTC-366B18.4	17.815	0.888915	0.00257422	0.0332717
ENSG00000272137	RP11-177G23.2	2.1153	1.2064	0.00479095	0.0496103
ENSG00000272216	LL22NC03-2H8.5	22.9912	1.31593	0.000600307	0.0126411
ENSG00000272316	XXbac-BPGBPG55C20.2	110.191	1.2921	2.42816e-07	2.25604e-05
ENSG00000272327	RP11-1002K11.1	12.7179	1.34161	0.00168341	0.0253575
ENSG00000272512	RP11-54O7.17	55.6196	0.968991	0.00359297	0.0410922
ENSG00000272520	CTD-2044J15.2	66.3246	0.591604	0.00479793	0.0496535
ENSG00000272656	RP11-219D15.3	2.4554	1.37565	0.00163009	0.0248393
ENSG00000272702	RP11-44N22.3	7.74892	-1.55344	0.000134694	0.00435124
ENSG00000272755	RP11-326G21.1	40.0737	0.985857	0.00128169	0.0210258
ENSG00000273018	CTD-2303H24.2	38.6141	1.05063	0.000467039	0.0106559
ENSG00000273084	RP11-1275H24.3	15.232	-1.00739	0.00127012	0.0209669
ENSG00000273131	RP6-42F4.1	191.261	0.977454	2.09005e-06	0.000147272
ENSG00000273133	RP11-799M12.2	3.31696	-1.37587	0.00161651	0.0247041
ENSG00000273193	RP11-523G9.3	19.0687	1.47057	0.000389737	0.00947186
ENSG00000273355	RP11-672L10.6	3.39986	1.39744	0.00137161	0.0220192
ENSG00000273373	RP5-1074L1.4	32.6525	0.988272	0.00184498	0.0269784
ENSG00000273448	RP11-166O4.6	8.4722	1.43543	0.00016464	0.00507652

## Sheet: S3. MFS pathways
Table S3. Significantly enriched pathways in MFS according to IPA
Highlighted pathways are involved in inflammatory response (red), mitochondria (green), or both (blue)
Ingenuity Canonical Pathways	-log10(p-value)	Ratio	z-score	Molecules
STAT3 Pathway	5.83	0.175	-0,943	RAP1B,SOCS1,SRC,SOCS3,IL4R,MAP3K11,TGFBR3,FGFR2,JAK2,MAPK12,MAPK11,CSF2RB,PIM1,CDKN1A,CISH,TGFB2,SOCS2,FGFRL1
Sirtuin Signaling Pathway	5.03	0.11	-0,626	ATP5F1D,DUSP6,ARG2,ESRRA,ABCA1,VDAC2,NDUFA5,PCK2,MT-CYB,H1FX,NAMPT,TUBA1C,MT-ND2,PFKFB3,ARNTL,MT-ND6,MT-ATP6,NDUFS7,GLS,STK11,G6PD,MT-ND4,MAPK12,AGTRAP,ATG2A,TIMM23B,MT-ND1,H3F3A/H3F3B,SREBF1,TSPO,SDHD,MAP1LC3C
LXR/RXR Activation	3.72	0.132	0,302	MLXIPL,VTN,ARG2,ABCG1,SAA2,SERPINF2,ABCA1,IL18RAP,CCL2,SREBF1,FASN,SERPINA1,S100A8,NCOR2,TNFRSF1B,CYP51A1
EIF2 Signaling	3.69	0.106	-2,496	RAP1B,RPS3A,RPS27,PPP1CB,FGFR2,EIF3E,RPL7,RPL9,RPS28,RPS15,RPL18A,HNRNPA1,RPS26,SREBF1,RPL26L1,MT-TM,RPL23A,RPL21,RPL10,RPS2,ACTC1,RPL13A,RPLP0,RPSA
Mitochondrial Dysfunction	3.31	0.111	NaN	MT-CO1,FURIN,MT-ND6,MT-ATP6,ATP5F1D,NDUFS7,COX5B,MT-ND4,MT-CO2,MAPK12,VDAC2,VPS9D1,MAOB,NDUFA5,MT-ND1,MT-CYB,SDHD,MT-CO3,MT-ND2
Oxidative Phosphorylation	3.2	0.128	-2,673	MT-CO1,MT-ATP6,ATP5F1D,NDUFS7,COX5B,MT-ND4,MT-CO2,VPS9D1,NDUFA5,MT-ND1,MT-CYB,MT-CO3,SDHD,MT-ND2
Role of JAK family kinases in IL-6-type Cytokine Signaling	3.04	0.24	NaN	SOCS1,SOCS3,IL6R,JAK2,MAPK12,MAPK11
iNOS Signaling	2.95	0.178	-1,342	CALM1 (includes others),JAK2,HMGA1,NFKBIB,MAPK12,MAPK11,IRF1,IRAK1
Antioxidant Action of Vitamin C	2.75	0.12	-0,302	NAPEPLD,PLA2R1,PLA2G4C,JAK2,MAPK12,SLC2A4,MAPK11,SLC2A3,PLD1,PLD4,CSF2RB,PLCD3,NFKBIB
Fcγ Receptor-mediated Phagocytosis in Macrophages and Monocytes	2.35	0.118	-1,508	PLD4,GAB2,SRC,PXN,NAPEPLD,ARPC1B,HCK,ACTC1,PLD1,FGR,VASP
Superpathway of Citrulline Metabolism	2.35	0.267	-1,000	LOC102724788/PRODH,GLS,ASS1,ARG2
Role of JAK2 in Hormone-like Cytokine Signaling	2.32	0.176	NaN	SOCS1,SOCS3,SH2B2,SOCS2,JAK2,SIRPA
Triacylglycerol Biosynthesis	2.26	0.152	-2,646	ABHD5,LPCAT3,AGPAT2,PLPPR2,DGAT2,DGAT1,MBOAT7
Proline Degradation	2.19	0.667	NaN	ALDH4A1,LOC102724788/PRODH
Aryl Hydrocarbon Receptor Signaling	2.15	0.099	-1,414	SRC,ALDH4A1,NFIC,NQO2,CYP1B1,PTGES3,AHRR,ALDH1L1,ALDH1L2,CDKN1A,TGFB2,NCOR2,ALDH16A1,CDK2
Citrulline Biosynthesis	2.14	0.333	NaN	LOC102724788/PRODH,GLS,ARG2
Role of NFAT in Cardiac Hypertrophy	1.97	0.084	-2,000	CACNA1G,RAP1B,HDAC9,SRC,ADCY3,FGFR2,NFATC4,MAPK12,MAPK11,CALM1 (includes others),NKX2-5,PLCD3,CACNA1E,CACNA2D1,GNB2,TGFB2,SLC8A1,RCAN2,CAMK2B
Production of Nitric Oxide and Reactive Oxygen Species in Macrophages	1.96	0.088	-2,840	RAP1B,MAP3K11,FGFR2,PPP1CB,ARG2,JAK2,MAPK12,MAPK11,SPI1,IRF1,CYBA,SERPINA1,S100A8,RHOF,TNFRSF1B,NFKBIB,SIRPA
GM-CSF Signaling	1.91	0.114	-1,667	RAP1B,CSF2RB,PIM1,CISH,HCK,FGFR2,JAK2,BCL2A1,CAMK2B
Arginine Degradation I (Arginase Pathway)	1.9	0.5	NaN	ALDH4A1,ARG2
Pentose Phosphate Pathway	1.88	0.273	NaN	TKT,TALDO1,G6PD
UDP-N-acetyl-D-galactosamine Biosynthesis II	1.88	0.273	NaN	GALE,HK3,UAP1
IL-10 Signaling	1.8	0.116	NaN	SOCS3,IL4R,BLVRB,ARG2,NFKBIB,MAPK12,MAPK11,IL18RAP
Type I Diabetes Mellitus Signaling	1.79	0.099	-0,632	HLA-G,SOCS1,SOCS3,SOCS2,JAK2,NFKBIB,MAPK12,TNFRSF1B,MAPK11,IRF1,IRAK1
Role of Macrophages, Fibroblasts and Endothelial Cells in Rheumatoid Arthritis	1.74	0.075	NaN	RAP1B,SOCS1,SFRP4,SRC,SOCS3,SELE,ICAM1,DVL1,IL6R,MMP13,FGFR2,NFATC4,JAK2,IL17RA,IL18RAP,IRAK1,PLCD3,CALM1 (includes others),CCL2,VEGFD,NFKBIB,TNFRSF1B,CAMK2B,ADAMTS4
mTOR Signaling	1.71	0.082	0,000	RAP1B,NAPEPLD,RPS3A,RPS27,STK11,FGFR2,EIF3E,PLD1,RPS28,PLD4,DGKZ,RPS15,RPS26,VEGFD,RPS2,RHOF,RPSA
Acute Phase Response Signaling	1.69	0.085	-0,577	RAP1B,SOCS1,SOCS3,IL6R,JAK2,SAA2,MAPK12,MAPK11,SERPINF2,IRAK1,ITIH2,SOCS2,SERPINA1,TNFRSF1B,NFKBIB
Role of IL-17A in Psoriasis	1.67	0.231	NaN	S100A9,S100A8,IL17RA
Choline Biosynthesis III	1.67	0.231	NaN	PLD4,NAPEPLD,PLD1
Putrescine Degradation III	1.67	0.174	0,000	ALDH4A1,MAOB,ALDH1L1,ALDH1L2
IL-17A Signaling in Fibroblasts	1.63	0.143	NaN	CCL2,NFKBIB,MAPK12,IL17RA,MAPK11
CDP-diacylglycerol Biosynthesis I	1.6	0.167	-2,000	ABHD5,LPCAT3,AGPAT2,MBOAT7
Adipogenesis pathway	1.6	0.09	NaN	HDAC9,ZNF423,ARNTL,DGKD,SREBF1,AGPAT2,FGFR2,FGFRL1,NFATC4,TBL1XR1,SLC2A4,FGF1
Phospholipases	1.57	0.113	1,134	PLD4,PLCD3,NAPEPLD,PLA2R1,PLA2G4C,PLA1A,PLD1
Pancreatic Adenocarcinoma Signaling	1.57	0.092	0,333	PLD4,NAPEPLD,CDKN1A,TGFB2,ABL1,VEGFD,FGFR2,JAK2,MAPK12,PLD1,CDK2
AMPK Signaling	1.55	0.079	-1,387	SRC,PFKFB3,RAB9B,RAB2A,STK11,FGFR2,MAPK12,MAPK11,SLC2A4,ADRA1D,AK5,PCK2,FASN,CDKN1A,CHRNA7,ADRA2C,CHRNE
Tryptophan Degradation X (Mammalian, via Tryptamine)	1.54	0.16	0,000	ALDH4A1,MAOB,ALDH1L1,ALDH1L2
Role of JAK1 and JAK3 in γc Cytokine Signaling	1.54	0.104	NaN	RAP1B,SOCS1,SOCS3,IL15RA,IL4R,SH2B2,FGFR2,JAK2
Chemokine Signaling	1.54	0.104	-2,121	RAP1B,CALM1 (includes others),SRC,CCL2,PPP1CB,MAPK12,MAPK11,CAMK2B
Dopamine Degradation	1.53	0.135	0,447	ALDH4A1,MAOB,ALDH1L1,ALDH1L2,SULT1A3/SULT1A4
Urea Cycle	1.53	0.333	NaN	ASS1,ARG2
UDP-N-acetyl-D-glucosamine Biosynthesis II	1.53	0.333	NaN	UAP1,GFPT2
Type II Diabetes Mellitus Signaling	1.5	0.084	-0,816	CACNA1G,SOCS3,SOCS1,FGFR2,MAPK12,SMPD2,SLC2A4,CACNA1E,SH2B2,CACNA2D1,SOCS2,TNFRSF1B,NFKBIB
IL-8 Signaling	1.49	0.079	-0,832	RAP1B,SRC,ANGPT2,NAPEPLD,ICAM1,ANGPT1,FGFR2,MAPK12,PLD1,IRAK1,PLD4,GNB2,VEGFD,RHOF,NFKBIB,VASP
Phosphatidylglycerol Biosynthesis II (Non-plastidic)	1.49	0.154	-2,000	ABHD5,LPCAT3,AGPAT2,MBOAT7
Hepatic Fibrosis / Hepatic Stellate Cell Activation	1.49	0.08	NaN	IL4R,ICAM1,IL6R,FGFR2,MMP13,FGF1,IL18RAP,COL21A1,CD40,CCL2,TGFB2,VEGFD,ECE1,TNFRSF1B,COL7A1
Netrin Signaling	1.47	0.108	NaN	CACNA1G,CACNA1E,UNC5A,RYR2,CACNA2D1,NFATC4,UNC5C
Calcium Signaling	1.44	0.078	-1,155	CACNA1G,RAP1B,HDAC9,CHRFAM7A,RYR2,TRPC4,NFATC4,CALM1 (includes others),CACNA1E,CACNA2D1,CHRNA7,CHRNE,SLC8A1,ACTC1,RCAN2,CAMK2B
Cardiac Hypertrophy Signaling	1.42	0.075	-3,000	RAP1B,MAP3K11,ADCY3,IL6R,FGFR2,NFATC4,MAPK12,MAPK11,ADRA1D,CALM1 (includes others),NKX2-5,PLCD3,CACNA1E,GNA15,TGFB2,GNB2,ADRA2C,RHOF
Noradrenaline and Adrenaline Degradation	1.41	0.125	-0,447	ALDH4A1,ADH1A,MAOB,ALDH1L1,ALDH1L2
Pentose Phosphate Pathway (Non-oxidative Branch)	1.4	0.286	NaN	TKT,TALDO1
Adenine and Adenosine Salvage III	1.4	0.286	NaN	PNP,ADAT3
nNOS Signaling in Skeletal Muscle Cells	1.37	0.122	NaN	CACNA1G,CALM1 (includes others),CACNA1E,RYR2,CACNA2D1
Estrogen Biosynthesis	1.37	0.122	-1,342	AKR1C3,HSD17B12,CYP1B1,CYP51A1,HSD17B14
Leukocyte Extravasation Signaling	1.36	0.076	-1,941	RAP1B,CLDN10,SRC,PXN,ICAM1,ABL1,FGFR2,MMP13,MAPK12,MAPK11,CLDN23,CLDN12,CYBA,ITGA1,ACTC1,VASP
Role of IL-17A in Arthritis	1.35	0.101	NaN	CCL2,MMP13,FGFR2,NFKBIB,MAPK12,IL17RA,MAPK11
Role of Tissue Factor in Cancer	1.35	0.085	NaN	RAP1B,SRC,GNA15,HCK,MMP13,PLAUR,FGFR2,JAK2,MAPK12,MAPK11,FGR
Endothelin-1 Signaling	1.34	0.077	-0,535	RAP1B,SRC,NAPEPLD,PLA2R1,PLA2G4C,ADCY3,FGFR2,MAPK12,MAPK11,PLD1,PLD4,PLCD3,GNA15,ECE1,SHF
Thio-molybdenum Cofactor Biosynthesis	1.32	1	NaN	MOCOS
Xanthine and Xanthosine Salvage	1.32	1	NaN	PNP
Lipoate Salvage and Modification	1.32	1	NaN	LIPT1
UDP-N-acetyl-D-galactosamine Biosynthesis I	1.32	1	NaN	GALE
NaN z-sccore cannot be calculated
